# Supplementary material for: Ancestral diversity in lipoprotein(a) studies helps address evidence gaps
Source: PubMed Central journal article supplement — Open Heart. 2023 Aug 30;10(2):e002382. doi: 10.1136/openhrt-2023-002382 (PMC10471864; doi:10.1136/openhrt-2023-002382), 2023-08-30
Supplement: openhrt-2023-002382supp001.pdf [file openhrt-2023-002382supp001.pdf]

## DETAILED METHODS

### Study populations

#### *The United Kingdom Biobank (UK Biobank)*

UK Biobank is a large, prospective study with extensive genetic and phenotypic data collected on ~500,000 volunteers across the UK aged 40 to 69 at recruitment (**Supplemental Table 1**). The baseline assessment was performed between 2006 and 2010 in 22 assessment centers throughout the UK, covering various settings to represent socioeconomic and racial/ethnic heterogeneity. At the baseline exam, participants completed questionnaires assessing their social backgrounds, lifestyle, cognitive, physical functioning, mood and personality; blood, urine and saliva samples also were collected. All participants were followed up through linkage to health and medical records. The study design and characteristics of UK Biobank have been detailed elsewhere<sup>1,2</sup>.

#### *The Population Architecture using Genomics and Epidemiology (PAGE) Study*

The multi-ethnic PAGE study<sup>3</sup> is a consortium funded by the National Institutes of Health to examine the genetic architecture of common complex diseases and traits in diverse populations. PAGE data used in this study included participants enrolled in the following cohort studies:

#### *Atherosclerosis Risk in Communities Study (ARIC)*

ARIC is a multi-center prospective epidemiologic cohort study funded by the National Heart, Lung, and Blood Institute (NHLBI) to investigate the causes of atherosclerosis and its clinical outcomes, and variation in cardiovascular risk factors, medical care, and disease by race,

gender, location, and date.<sup>4</sup> 15,792 participants ages 45-64 of primarily European American and African American descent were recruited between 1987 and 1989 from four communities in the United States: Washington County, MD; Forsyth County, NC; Jackson, MS; and Minneapolis, MN. At study baseline (1987-1989), participants received standardized physical examinations and interviewer-administered questionnaires. Semi-annual telephone follow-up calls are ongoing to maintain contact and assess health status of the cohort.

#### *The Coronary Artery Risk Development in Young Adults Study (CARDIA)*

CARDIA is a multi-center prospective cohort study funded by the NHLBI to study the development and distribution of cardiovascular diseases and their risk factors<sup>5</sup>. 5,115 participants ages 18-30 years (52% African American, 55% women) were recruited in 1985-1986 from four communities in the United States: Birmingham, AL; Chicago, IL; Minneapolis, MN; and Oakland, CA. The participants were selected so that there would be approximately the same number of people in subgroups of race, gender, education (high school or less/more than high school) and age (18-24 and 25-30) in each of these 4 centers. Participants were asked to participate in follow-up examinations during 1987-1988 (Year 2), 1990-1991 (Year 5), 1992-1993 (Year 7), 1995-1996 (Year 10), 2000-2001 (Year 15), and 2005-2006 (Year 20), 2010-2011 (Year 25), and 2015-2016 (Year 35). Data have been collected on factors believed to be related to heart disease, including blood pressure, cholesterol and other lipids, and glucose as well as physical measurements such as weight and skinfold fat, as well as lifestyle factors, behavioral and psychological variables, and medical and family history.

#### *Jackson Heart Study (JHS)*

The JHS is a longitudinal, population-based cohort designed for prospective research into

the epidemiology and determinants of cardiovascular disease (CVD) in African American populations from the Jackson, Mississippi metropolitan area<sup>6</sup>. The design and sampling of JHS initially only included participants from the Jackson cohort of the ARIC study, random and family components. To reach recruitment goals and address community concerns regarding broad participation, an additional structured volunteer sample was added later<sup>7</sup>. Study baseline data collection began in late 2000 and was completed in early 2004, and a total of 5,306 male and female participants were recruited. The baseline examination included a home interview, a clinic visit, laboratory tests, complete blood cell counts, and a physical examination.

#### *The Mount Sinai BioMe Biobank*

The Mount Sinai BioMe Biobank is an ongoing, broadly consented, electronic health record (HER)-linked clinical care Biobank that enrolls participants non-selectively from the Mount Sinai Medical Center patient population. As of Oct 2021, BioMe comprises >60,000 participants, who represent a broad racial, ethnic and socioeconomic diversity, characteristic of the communities served by Mount Sinai Hospital. Participants are predominantly of African (24%), Hispanic/Latino (35%), European (32%), and other backgrounds (10%), and between 18 and 89 years. Enrolled participants consent to be followed throughout their clinical care (past, present, and future) in real-time, allowing us to integrate their genomic information with their EHRs for discovery research and clinical care implementation. Approximately 22% of the BioMe participants have been diagnosed with chronic disease, predominantly diabetes, cardiovascular disease, chronic kidney disease.

#### *Multi-Ethnic Study of Atherosclerosis (MESA)*

MESA was initiated in 2000 to investigate subclinical cardiovascular disease and the risk factors that predict progression to clinically overt cardiovascular disease in a multi-ethnic US population free of clinically recognized cardiovascular disease at study baseline.<sup>8</sup> The population-based cohort recruited 6,814 men and women of European American (38%), African American (28%), Hispanic (22%), and Chinese American (12%) descent, 45-84 years of age from six field centers (Winston-Salem, NC; St. Paul, MN; Chicago, IL; Los Angeles, CA; New York, NY; Baltimore, MD). The baseline examination, which was designed to be the most comprehensive of all examinations, included a physical examination, biospecimen collection, completion of questionnaires, and non-invasive measurement of subclinical disease indicators and risk factors.

#### *The Women's Health Initiative Study (WHI)*

WHI is a long-term prospective study to investigate causes of morbidity and mortality among postmenopausal women in the United States<sup>9</sup>. Between 1993 and 1998, 161,808 women ages 50-79 years were recruited from 40 clinical centers and enrolled in randomized clinical trials or an observational cohort study. Women in the observational study received a standardized examination at baseline and interviewer-administered questionnaires. The following ancillary studies were included in this analysis: the Genetics and Epidemiology of Colorectal Cancer Consortium (GECCO), the Genomics and Randomized Trials Networks (GARNET), the Hip Fracture GWAS (HIPFX), the Women's Health Initiative Memory Study (WHIMS), and the Women's Health Initiative-SNP Health Association Resource (WHI-SHARE).

The participants included from GECCO, GARNET, HIPFX and WHIMS were

self-reported White, while participants included from WHI-SHARe were self-reported Black/African American.

### **Genotyping and imputation**

Genotyping platform, quality control, and imputation methods are specified for UK Biobank and each PAGE study in **Supplemental Table 2**.

### **Lipoprotein (a) measurement**

Lipoprotein (a) [Lp(a)] was measured using various assays at baseline visits, except in ARIC, which was measured at visit 4. The assay methods and the distributions of Lp(a) in participating studies are detailed in **Supplemental Table 3**. Participants with Lp(a) values below limits of detection or four standard deviations from the study- and ancestry-specific mean were excluded.

### **PRS construction**

Because of the strong genetic effects of the *LPA* locus, we began by examining five approaches restricted to variants within 2 Mb of *LPA*. The first PRS we examined used data on 43 independent *LPA* variants, was constructed in an external European ancestral population and had the best performance of available Lp(a) PRS ( $R^2 = 59\%$ ).<sup>10</sup> We applied this PRS to African, South Asian, and East Asian participants in the UK Biobank to assess transportability of a European derived PRS across ancestries. Second, we examined two approaches (Pruning and Thresholding<sup>11</sup> and LDpred2<sup>12</sup>) that constructed PRS using independent discovery and target data within the same ancestry. Here, PAGE Study data served as our discovery sample and UK Biobank data served as the target sample. Because the PAGE Study did not include data on

participants of South Asian ancestry, we used trans-ethnic PAGE Study results for the discovery population. Our third approach - GWAS significant independent signals - was to construct Lp(a) PRS based on the independently associated variants that were identified across ancestry-specific GWAS meta-analyses using GCTA-COJO. For this approach, we included PAGE Study and UK Biobank participants and applied the cross-validation (Crosspred)<sup>13</sup> method to account for lack of independence in the discovery and target samples. Fourth, to examine PRS performance in cases where independent discovery and target data are unavailable (e.g., South Asian participants) or when target data have very large sample size that could be informative for PRS construction, we estimated ancestrally specific PRS in UK Biobank participants using Crosspred.

We also examined the accuracy of Lp(a) PRS extended to include variants outside the *LPA* locus. Here, we extended two approaches— GWAS significant independent signals and Crosspred. These methods were prioritized given their improved performance when compared to LDpred2 and Pruning and Thresholding. Briefly, we considered variants in loci harboring at least one genome-wide significant ( $P < 5 \times 10^{-9}$ ) variant for the GWAS significant independent signals approach. For Crosspred, because evaluating all 1000 Genomes-imputed variants was computationally infeasible, we restricted to Hapmap3 variants, but did not impose any *P*-value based criteria.

**Supplemental Figure 1.** Calibration plots for lipoprotein (a) [Lp(a)] concentration according to the ancestry-specific polygenic risk score percentiles in four ancestral groups in UK Biobank. The agreement between the predicted and observed Lp(a) was assessed using the best-performing polygenic risk score in each ancestry. A blue dotted line at 125 nmol/L was added to indicate a suggested Lp(a) risk enhancing threshold.

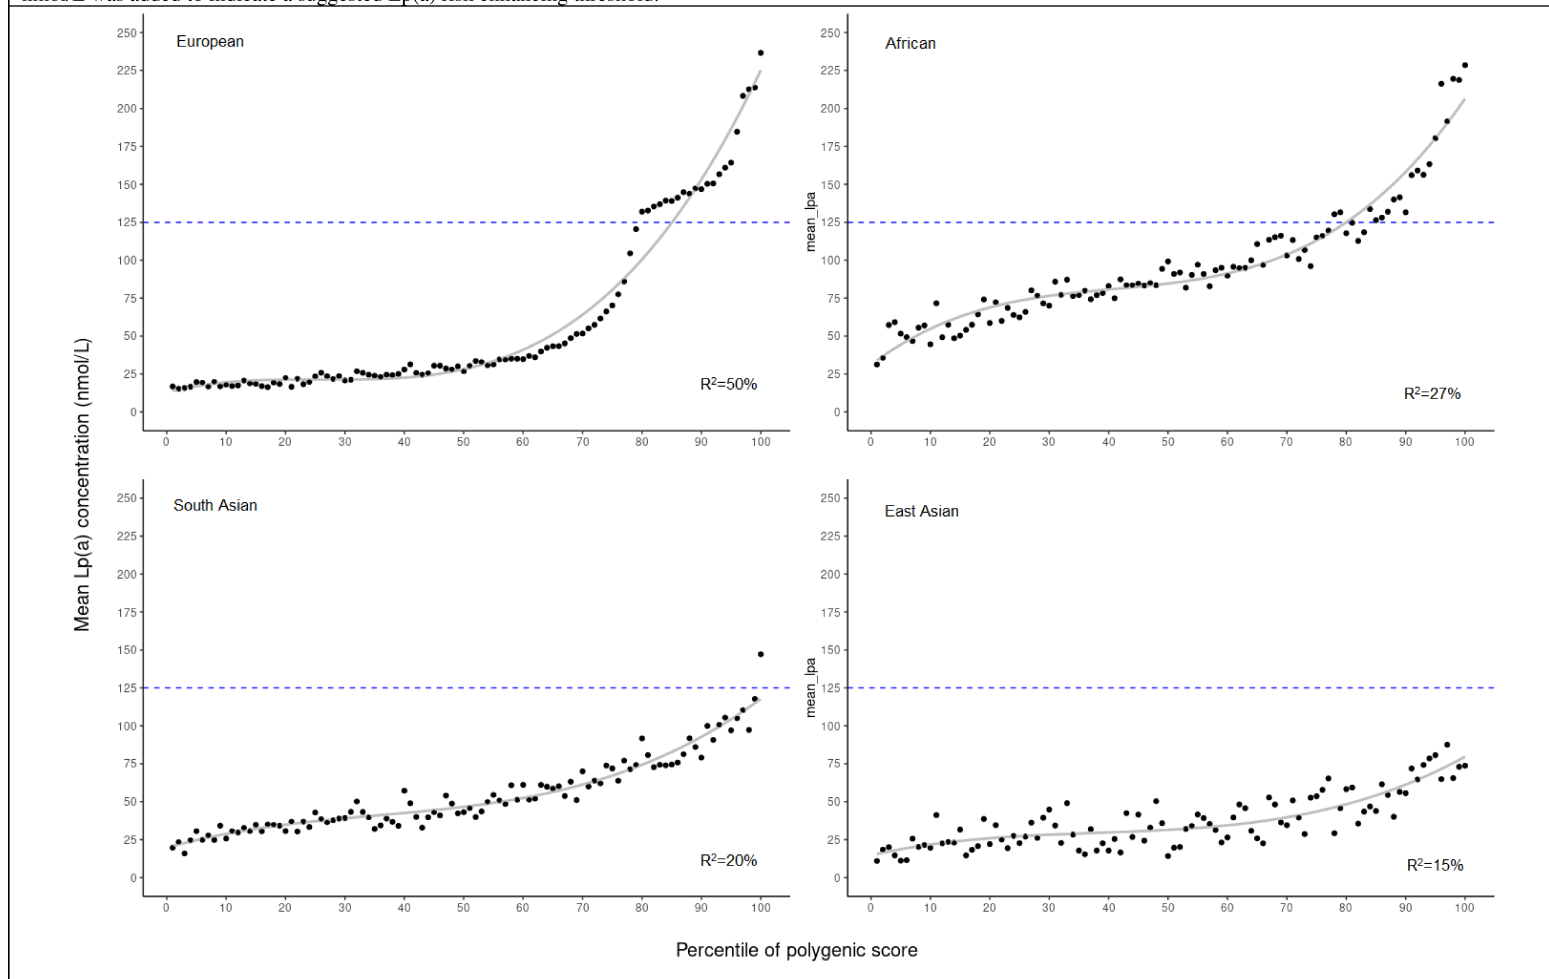

**Supplemental Figure 2.** Manhattan plots by race/ethnicity for a multi-ethnic GWAS of Lp(a) in (A) African, (B) East Asian, (C) European, and (D) South Asian descent populations. The genome-wide significant ( $P < 5 \times 10^{-9}$ ) and genome-wide suggestive ( $P < 5 \times 10^{-6}$ ) thresholds are shown by the red and blue dashed horizontal lines, respectively.

**A. Africans (n=18,993)**

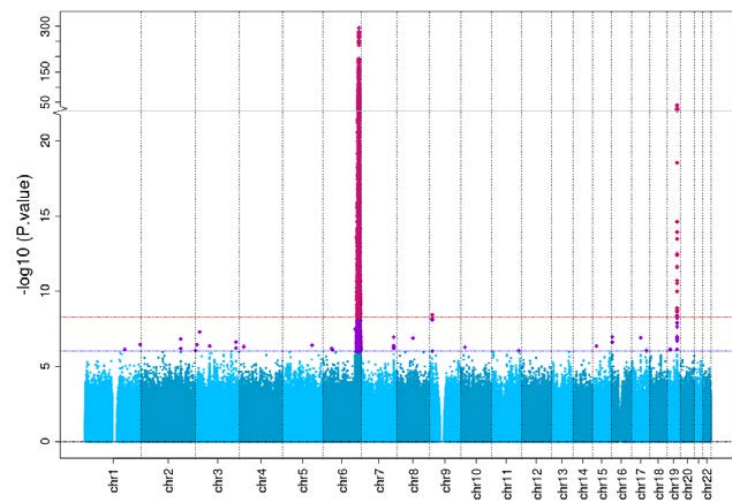

**B. East Asians (n=2,189)**

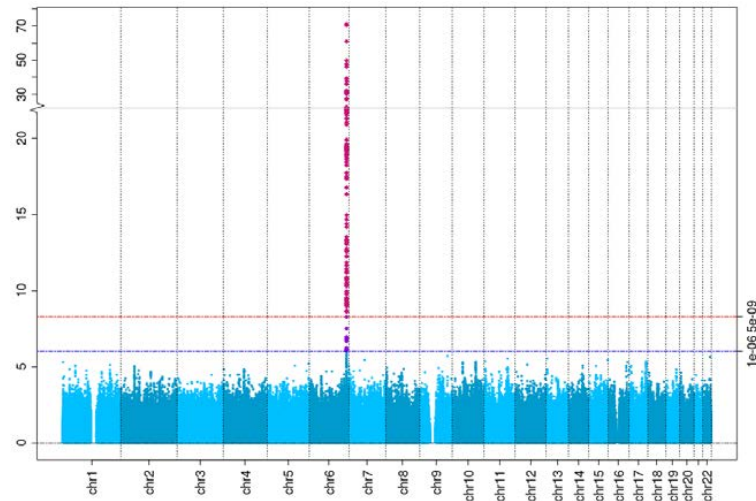

**C. Europeans (n=354,843)**

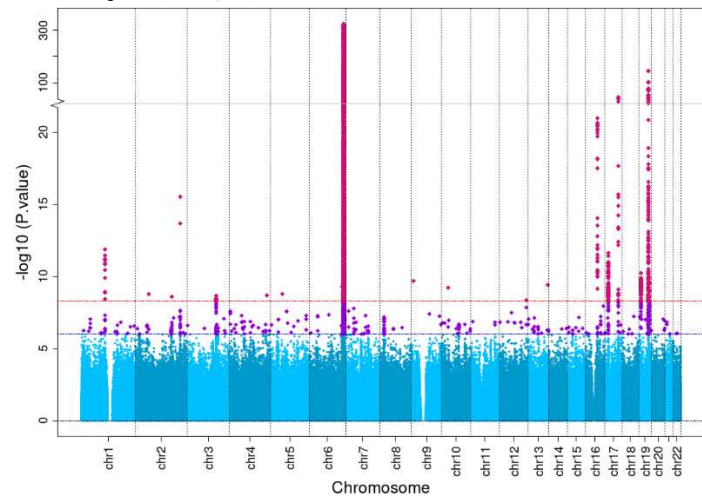

**D. South Asians (n= 8,192)**

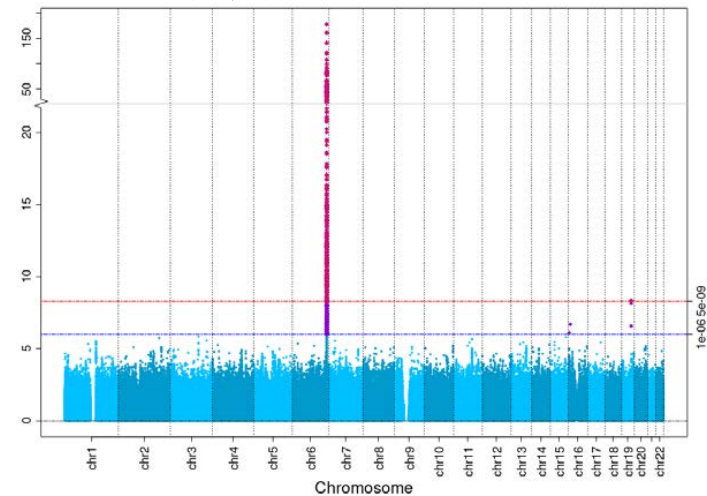



**Supplemental Table 1. Data sources and select characteristics by participating studies.** Information on data sources for the United Kingdom Biobank (UK Biobank) and six Population Architecture through Genomics and Environment (PAGE) Study cohorts are described in detail. Distributions of the selected characteristics of the study participants are presented to provide an overall description of the study population.

|                                    | PAGE<br>(n=50,703)                                                                                                                                   |                                                                                                          |                                                               |                                                           |                                                                                     |                                                                                     |                                                                                                                      |
|------------------------------------|------------------------------------------------------------------------------------------------------------------------------------------------------|----------------------------------------------------------------------------------------------------------|---------------------------------------------------------------|-----------------------------------------------------------|-------------------------------------------------------------------------------------|-------------------------------------------------------------------------------------|----------------------------------------------------------------------------------------------------------------------|
|                                    | UK Biobank<br>(n=357,096)                                                                                                                            | ARIC<br>(n=11,457)                                                                                       | CARDIA<br>(n=4,099)                                           | WHI<br>(n=4,361)                                          | JHS<br>(n=3,260)                                                                    | MESA<br>(n=4,650)                                                                   | BioMe<br>(n=22,876)                                                                                                  |
| <b>Data sources</b>                |                                                                                                                                                      |                                                                                                          |                                                               |                                                           |                                                                                     |                                                                                     |                                                                                                                      |
| Study type                         | Longitudinal                                                                                                                                         | Longitudinal                                                                                             | Longitudinal                                                  | Cohort and clinical trials                                | Longitudinal                                                                        | Longitudinal                                                                        | Biobank                                                                                                              |
| Study focus                        | Wide range of complex disease                                                                                                                        | Cardiovascular disease                                                                                   | Cardiovascular disease                                        | Women's health                                            | Cardiovascular disease                                                              | Cardiovascular disease                                                              | Wide range of complex disease                                                                                        |
| Regions                            | United Kingdom (UK)                                                                                                                                  | Washington County, MD; Forsyth County, NC; Jackson, MS; and Minneapolis, MN                              | Birmingham, AL; Chicago, IL; Minneapolis, MN; and Oakland, CA | 40 Clinical Centers in the United States                  | Jackson, MS                                                                         | Six US field centers                                                                | New York City, NY                                                                                                    |
| Years of data collection           | 2006-present                                                                                                                                         | 1987-present                                                                                             | 1985-present                                                  | 1993-present                                              | 1998-present                                                                        | 2000-present                                                                        | 2007 - present                                                                                                       |
| Follow-up assessment               | Initial assessment in 22 centers in UK between 2006-2010; repeat of baseline assessment in 2013; linkages to cancer registry and hospital admissions | Semi-annual interview via telephone; an extensive examination at baseline in 1987-1989 and every 3 years | Follow-up examinations every 2-5 years                        | Annual in-person interviews, semi-annual phone interviews | Follow-up examinations and questionnaires every 2-5 years. Annual follow-up ongoing | Follow-up examinations and questionnaires every 2-5 years. Annual follow-up ongoing | Enrolled participants consent to be followed throughout their clinical care (past, present, and future) in real-time |
| Phenotypic data sources            | Questionnaire, physical measures, samples, health record linkage (registries, EMR)                                                                   | In-person examinations, limited CVD surveillance                                                         | In-person examinations, limited CVD surveillance              | In-person examinations, limited CVD surveillance          | In-person examinations, surveillance                                                | In-person examinations, limited CVD surveillance                                    | Electronic medical records                                                                                           |
| <b>Participant characteristics</b> |                                                                                                                                                      |                                                                                                          |                                                               |                                                           |                                                                                     |                                                                                     |                                                                                                                      |
| Age - Median (years)               | 58                                                                                                                                                   | 54                                                                                                       | 25                                                            | 63                                                        | 54                                                                                  | 62                                                                                  | 63                                                                                                                   |
| Age Range (years)                  | 37-72                                                                                                                                                | 44-66                                                                                                    | 18-35                                                         | 50-79                                                     | 34-80+                                                                              | 45-84                                                                               | 18-92                                                                                                                |
| Female - %                         | 55                                                                                                                                                   | 57                                                                                                       | 56                                                            | 100                                                       | 58                                                                                  | 52                                                                                  | 59                                                                                                                   |
| Race/Ethnicity or ancestry - No.   |                                                                                                                                                      |                                                                                                          |                                                               |                                                           |                                                                                     |                                                                                     |                                                                                                                      |
| African/African American           | 8,046                                                                                                                                                | 2,553                                                                                                    | 1,982                                                         | 1,603                                                     | 3,260                                                                               | 1,549                                                                               | 6,215                                                                                                                |
| East Asian                         | 2,189                                                                                                                                                | 0                                                                                                        | 0                                                             | 0                                                         | 0                                                                                   | 706                                                                                 | 0                                                                                                                    |
| European/White                     | 338,669                                                                                                                                              | 8,904                                                                                                    | 2,117                                                         | 2,758                                                     | 0                                                                                   | 2,395                                                                               | 7,715                                                                                                                |
| South Asian                        | 8,192                                                                                                                                                | 0                                                                                                        | 0                                                             | 0                                                         | 0                                                                                   | 0                                                                                   | 0                                                                                                                    |
| Hispanic/Latino                    | 0                                                                                                                                                    | 0                                                                                                        | 0                                                             | 0                                                         | 0                                                                                   | 0                                                                                   | 8,946                                                                                                                |

**Supplemental Table 2.** Genotyping, imputation, and quality control procedures implemented by UK Biobank and PAGE Study investigators.

|                     | UK Biobank                                                             | PAGE Study                         |                                    |                                    |                                                 |                                    |                                   |                          |                          |                                    |                                           |
|---------------------|------------------------------------------------------------------------|------------------------------------|------------------------------------|------------------------------------|-------------------------------------------------|------------------------------------|-----------------------------------|--------------------------|--------------------------|------------------------------------|-------------------------------------------|
|                     |                                                                        | ARIC                               | CARDIA                             | JHS                                | PAGE MEGA*                                      | MESA                               | WHI GARNET                        | WHI GECCO                | WHI HIPfx                | WHI SHARe                          | BioMe                                     |
| Genotyping platform | Affymetrix UI Biobank Axiom array and Axiom UK BiLEVE genotyping array | Affymetrix Gene Chip SNP array 6.0 | Affymetrix Gene Chip SNP array 6.0 | Affymetrix Gene Chip SNP array 6.0 | Infinium Expanded Multi-Ethnic Genotyping Array | Affymetrix Gene Chip SNP array 6.0 | Illumina Human Omni 1-Quad v1-0 B | ONCOarray                | Illumina 50K and 610K    | Affymetrix Gene Chip SNP array 6.0 | Regeneron Infinium Global Screening Array |
| QC filters          |                                                                        |                                    |                                    |                                    |                                                 |                                    |                                   |                          |                          |                                    |                                           |
| Sample call rate    | 97                                                                     | 90                                 | 95                                 | 90                                 | 98                                              | 90                                 | 98                                | 95                       | 98                       | 98                                 | 95                                        |
| HWE threshold       | $p > 10^{-6}$                                                          | $p > 10^{-6}$                      | $p > 10^{-6}$                      | $p > 10^{-6}$                      | $p > 10^{-6}$                                   | $p > 10^{-6}$                      | $p > 10^{-6}$                     | $p > 10^{-7}$            | $p > 10^{-6}$            | $p > 10^{-6}$                      | $p > 10^{-5}$                             |
| Imputation software | IMPUTE v2.3.1                                                          | IMPUTE version 2.3.2               | Mach (version 1.0.16)              | Minimac3                           | IMPUTE version 2.3.2                            | IMPUTE version 2.3.2               | IMPUTE version 2.3.2              | Minimac2                 | IMPUTE version 2.3.2     | IMPUTE version 2.3.2               | IMPUTE 2                                  |
| Reference panel     | 1000 Genomes Project Phase 1 and UK10K                                 | 1000 Genomes phase 3 v 5           | 1000 Genomes phase 3 v 5           | TopMED                             | 1000 Genomes phase 3 v 5                        | 1000 Genomes phase 3 v 5           | 1000 Genomes phase 3 v 5          | 1000 Genomes phase 3 v 5 | 1000 Genomes phase 3 v 5 | 1000 Genomes phase 3 v 5           | 1000 Genomes phase 3 v 5                  |
| Build               | 37                                                                     | 37                                 | 37                                 | 37                                 | 37                                              | 37                                 | 37                                | 37                       | 37                       | 37                                 | 37                                        |

\*For this study, includes African American participants from the Women's Health Initiative

**Supplemental Table 3. Description of methods used to develop polygenic risk score (PRS) of lipoprotein (a) in n=385,263 participants of African (n=19,333), East Asian (n=2,895), European (n=354,843), and South Asian (n=8,192) ancestry from the PAGE Study and UK Biobank.**

| Approach                             | Statistical method                                                                                                   | Discovery data                                                                                                                                                      | Regions examined                | Parameters                                                                                                                                                                                                         | LD-reference                                                                                                   | Software                  |
|--------------------------------------|----------------------------------------------------------------------------------------------------------------------|---------------------------------------------------------------------------------------------------------------------------------------------------------------------|---------------------------------|--------------------------------------------------------------------------------------------------------------------------------------------------------------------------------------------------------------------|----------------------------------------------------------------------------------------------------------------|---------------------------|
| External PRS                         | PRS developed using 43 variant identified by conditional analysis <sup>10</sup>                                      | CHD Exome+ Consortium; independent study of European ancestral populations <sup>14</sup>                                                                            | <i>LPA</i> region*              | NA                                                                                                                                                                                                                 | NA                                                                                                             | PLINK                     |
| Pruning and Thresholding (P+T)       | LD-based clumping and p-value thresholding                                                                           | Ancestry-specific PAGE Study results; trans-ethnic PAGE Study results for South Asian                                                                               | <i>LPA</i> region*              | P-value thresholds: from $5e^{-50}$ to 0.5; Clumping: $r^2 = 0.2$ ; window = 250kb                                                                                                                                 | Four ancestral populations in UK Biobank                                                                       | PRSice                    |
| LDpred2                              | Bayesian shrinkage                                                                                                   |                                                                                                                                                                     | <i>LPA</i> region*              | Heritability ( $h^2$ ) and non-zero effect fractions (p) are automatically estimated from the data.                                                                                                                | Four ancestral populations in UK Biobank                                                                       | bigsnpr                   |
| Crosspred                            | Cross-validation method using penalized regression; addresses lack of independence between discovery and target data | Four ancestral populations in UK Biobank                                                                                                                            | <i>LPA</i> region*; Genome-wide | Tuning parameters for penalized regression using lassosum software; EUR: $\lambda = 0.01$ , $s = 0.5$ ; AFR: $\lambda = 0.04$ , $s = 0.2$ ; SAS: $\lambda = 0.01$ , $s = 0.2$ ; EAS: $\lambda = 0.02$ , $s = 0.2$  | Ancestry-specific (AFR, EAS, EUR) or EUR (SAS) LD blocks developed based on the 1000 Genome data <sup>15</sup> | lassosum, crosspred       |
| GWAS significant independent signals | Independent signals by GCTA-COJO; PRS estimated using Crosspred                                                      | Ancestry-specific PAGE Study results and UK Biobank; trans-ethnic PAGE and UK Biobank study results for South Asian; lack of independence addressed using Crosspred | <i>LPA</i> region*; Genome-wide | Tuning parameters for penalized regression using lassosum software; EUR: $\lambda = 0.007$ , $s = 0.2$ ; AFR: $\lambda = 0.001$ , $s = 0.2$ ; SAS: $\lambda = 0.001$ , $s = 0.2$ ; EAS: $\lambda = 0.04$ , $s = 1$ | Ancestry-specific (AFR, EAS, EUR) or EUR (SAS) LD blocks developed based on the 1000 Genome data <sup>15</sup> | gcta, lassosum, crosspred |

CHD = coronary heart disease; PAGE = Population Architecture using Genomics and Epidemiology; GWAS = genome-wide association study; EUR = European descent; AFR = African descent; SAS = South Asian descent; EAS = East Asian descent

Target data to assess Lp(a) PRS: Four ancestral populations in UK Biobank

\**LPA* region  $\pm$  2 Mb

**Supplemental Table 4.** The assay method, measured unit, and distributions of Lipoprotein (a) in participating studies. The distributions of lipoprotein (a) are further stratified by race and ethnicity in each study to present the variability in levels between different populations.

| Participating studies and ancestry | N.      | Assay method                     | Unit reported | Lipoprotein (a)* |                                                      |                 |
|------------------------------------|---------|----------------------------------|---------------|------------------|------------------------------------------------------|-----------------|
|                                    |         |                                  |               | Mean (SD)        | Median (25 <sup>th</sup> tile-75 <sup>th</sup> tile) | >150 nmol/L (%) |
| <b>UK Biobank</b>                  |         |                                  |               |                  |                                                      |                 |
| European                           | 338,669 |                                  |               | 59.5 (72.6)      | 23.7 (10.0-87.3)                                     | 45,804 (14)     |
| African                            | 8,046   | Immunturbidimetry (Beckman)      | nmol/L        | 96.7 (76.3)      | 73.8 (42.9-132.3)                                    | 1,667 (21)      |
| South Asian                        | 8,192   |                                  |               | 54.4 (57.2)      | 34.3 (14.2-71.6)                                     | 665 (8)         |
| East Asian                         | 2,189   |                                  |               | 36.8 (45.0)      | 17.6 (9.1-45.7)                                      | 97 (4)          |
| <b>ARIC</b>                        |         |                                  |               |                  |                                                      |                 |
| European                           | 8,904   | Immunturbidimetry (Denka Seiken) | mg/dL         | 48.2 (28.3)      | 20.9 (8.9, 62.8)                                     | 727 (8.2)       |
| African                            | 2,553   |                                  |               | 87.4 (32.6)      | 70.6 (37.7, 116.6)                                   | 382 (15.0)      |
| <b>CARDIA</b>                      |         |                                  |               |                  |                                                      |                 |
| European                           | 2,117   | ELISA                            | mg/dL         | 30.5 (17.1)      | 13.7 (5.7, 43.6)                                     | 23 (1.1)        |
| African                            | 1,982   |                                  |               | 62.1 (23.3)      | 50.1 (24.0, 88.7)                                    | 120 (6.0)       |
| <b>WHI</b>                         |         |                                  |               |                  |                                                      |                 |
| European                           | 2,758   | ELISA                            | mg/dL         | 30.5 (17.1)      | 13.7 (5.7, 43.6)                                     | 23 (1.1)        |
| African                            | 1,603   |                                  |               | 62.1 (23.3)      | 50.1 (24.0, 88.7)                                    | 120 (6.0)       |
| JHS (African)                      | 3,260   | Immunturbidimetry (Denka Seiken) | mg/dL         | 125.3 (100.2)    | 98.6 (50.7, 172.7)                                   | 1030 (31.6)     |
| <b>MESA</b>                        |         |                                  |               |                  |                                                      |                 |
| European                           | 2,395   | Immunturbidimetry (Denka Seiken) | mg/dL         | 49.2 (66.0)      | 22.8 (8.2, 61.4)                                     | 221 (9.2)       |
| African                            | 1,549   |                                  |               | 98.5 (83.7)      | 74.1 (39.6, 134.8)                                   | 347 (22.4)      |
| East Asian                         | 706     |                                  |               | 39.8 (49.7)      | 23.0 (10.6, 46.3)                                    | 37 (5.2)        |

\*Lp(a) levels reported in mg/dL was converted to nmol/L using the equation: Lp(a), nmol/L=2.18×Lp(a), mg/dL-3.83 provided by Madsen et al.<sup>16</sup>

**Supplemental Table 5.** Lead variants for genome wide-significant ( $P < 5 \times 10^{-8}$ ) loci discovered in ancestry-specific Lp(a) genome-wide association studies (GWAS) of African (n=18,993), East Asian (n=2,895), European (n=354,843), and South Asian (n=8,192) PAGE Study and UK Biobank participants.

| Lead variant       | Chr | Position (hg19) | Effect allele | Non-effect allele | Locus                      | Coded allele effect (SE) | $\chi^2_Q$ | Effect allele frequency <sup>1</sup> |        |        |        | P-value   |          |           |           |
|--------------------|-----|-----------------|---------------|-------------------|----------------------------|--------------------------|------------|--------------------------------------|--------|--------|--------|-----------|----------|-----------|-----------|
|                    |     |                 |               |                   |                            |                          |            | AFR                                  | EAS    | EUR    | SAS    | AFR       | EAS      | EUR       | SAS       |
| <i>African</i>     |     |                 |               |                   |                            |                          |            |                                      |        |        |        |           |          |           |           |
| rs41269135         | 6   | 161087440       | A             | G                 | <i>LPA</i>                 | 0.94 (0.026)             | 0.59       | 0.0494                               | 0      | 0      | 0      | 2.06E-294 | .        | .         | .         |
| rs7039957          | 9   | 12728543        | T             | C                 | <i>LURAPIL-ASI</i>         | -0.19 (0.033)            | 0.40       | 0.9674                               | 0.8447 | 0.9271 | 0.7349 | 3.66E-09  | 0.56     | 0.9858    | 0.7703    |
| rs7412             | 19  | 45412079        | T             | C                 | <i>APOE</i>                | -0.26 (0.019)            | 0.0036     | 0.1098                               | 0.0853 | 0.0778 | 0.0428 | 2.41E-41  | 0.000015 | 6.51E-146 | 4.58E-09  |
| <i>East Asian</i>  |     |                 |               |                   |                            |                          |            |                                      |        |        |        |           |          |           |           |
| rs7770628          | 6   | 161018174       | T             | C                 | <i>LPA</i>                 | -0.74 (0.041)            | 0.10       | 0.7489                               | 0.8856 | 0.5308 | 0.6765 | 0.1738    | 8.30E-72 | 9.87E-40  | 1.16E-140 |
| <i>European</i>    |     |                 |               |                   |                            |                          |            |                                      |        |        |        |           |          |           |           |
| rs599839           | 1   | 109822166       | A             | G                 | <i>PSRC1</i>               | 0.025 (0.0035)           | 0.52       | 0.2609                               | 0.9301 | 0.7725 | 0.7346 | 0.3097    | 0.30     | 1.33E-12  | 0.869     |
| rs1047891          | 2   | 211540507       | A             | C                 | <i>CPSI</i>                | -0.026 (0.0031)          | 0.67       | 0.363                                | 0.1738 | 0.3156 | 0.3016 | 0.005996  | 0.60     | 2.98E-16  | 0.3489    |
| rs4678322          | 3   | 135812523       | T             | G                 | <i>PPP2R3A</i>             | 0.021 (0.0035)           | 0.32       | 0.399                                | 0.1383 | 0.2304 | 0.2398 | 0.2459    | 0.15     | 2.14E-09  | 0.01481   |
| rs111321550        | 4   | 174514218       | A             | C                 | <i>HAND2AS1-MORF4</i>      | -0.077 (0.013)           | N/a        | 0                                    | 0      | 0.9847 | 0.9909 | .         | .        | 2.03E-09  | 0.5903    |
| rs571472683        | 5   | 55495591        | A             | G                 | <i>ANKRD55</i>             | -0.13 (0.021)            | N/a        | 0                                    | 0      | 0.0059 | 0      | .         | .        | 1.64E-09  | .         |
| rs10455872         | 6   | 161010118       | A             | G                 | <i>LPA</i>                 | -1.21 (0.026)            | 0.19       | 0.9882                               | 0      | 0.9333 | 0.9891 | 7.33E-61  | .        | <1E-300   | 2.97E-50  |
| rs141546126        | 9   | 10599267        | A             | G                 | <i>PTPRD</i>               | 0.14 (0.023)             | N/a        | 0                                    | 0      | 0.0052 | 0      | .         | .        | 2.04E-10  | .         |
| rs12412956         | 10  | 31009857        | A             | G                 | <i>SVIL2P-LINC02644</i>    | 0.046 (0.0074)           | 0.083      | 0.9916                               | 0.9682 | 0.9525 | 0.9493 | 0.2857    | 0.59     | 6.02E-10  | 0.5481    |
| rs141027916        | 12  | 125539193       | T             | C                 | <i>THRIL-AACS</i>          | -0.1 (0.017)             | 0.74       | 0                                    | 0      | 0.0088 | 0      | .         | .        | 4.39E-09  | .         |
| rs543756678        | 13  | 110797505       | T             | C                 | <i>LOC101927712-COL4A1</i> | 0.13 (0.021)             | N/a        | 0                                    | 0.0138 | 0.0058 | 0      | .         | 0.87     | 3.84E-10  | .         |
| rs56156922         | 16  | 56987369        | T             | C                 | <i>HERPUDI1-CETP</i>       | 0.03 (0.0031)            | 0.20       | 0.8472                               | 0.8345 | 0.6768 | 0.6669 | 0.437     | 0.95     | 1.06E-21  | 0.6894    |
| rs8178824          | 17  | 64224775        | T             | C                 | <i>APOH</i>                | 0.12 (0.0087)            | 0.56       | 0.0051                               | 0      | 0.0304 | 0.0162 | 0.05257   | .        | 1.54E-45  | 0.05022   |
| rs1065853          | 19  | 45413233        | T             | G                 | <i>APOE</i>                | -0.14 (0.0056)           | 0.96       | 0.1156                               | 0.086  | 0.0777 | 0.0432 | 6.12E-41  | 0.000025 | 1.00E-145 | 7.20E-09  |
| <i>South Asian</i> |     |                 |               |                   |                            |                          |            |                                      |        |        |        |           |          |           |           |
| rs73596816         | 6   | 161017363       | A             | G                 | <i>LPA</i>                 | 0.77 (0.027)             | N/a        | 0.0361                               | 0.0419 | 0.0372 | 0.0927 | 1.04E-13  | 9.60E-47 | 3.25E-07  | 2.45E-178 |
| rs7412             | 19  | 45412079        | T             | C                 | <i>APOE</i>                | -0.23 (0.039)            | N/a        | 0.1098                               | 0.0853 | 0.0778 | 0.0428 | 2.41E-41  | 0.000015 | 6.51E-146 | 4.58E-09  |

<sup>1</sup>. Weighted average of PAGE Study and UK Biobank ancestry-specific effect allele frequencies. AFR, African. Chr, chromosome. EAS, East Asian. EUR, European. N/a, not applicable. SAS, South Asian. SE, standard error.  $\chi^2_Q$ , Cochran's Q test of heterogeneity.

**Supplemental Table 6.** Number of independent secondary signals, by chromosome, in ancestry specific GWAS of Lp(a) among PAGE study and UK Biobank participants. Results are restricted to loci with at least two independent signals in at least one population.

| <b>Ancestry</b> | <b>Chromosome</b> |          |           |           |
|-----------------|-------------------|----------|-----------|-----------|
|                 | <b>2</b>          | <b>6</b> | <b>17</b> | <b>19</b> |
| African         | 0                 | 38       | 0         | 0         |
| East Asian      | 0                 | 2        | 0         | 0         |
| European        | 2                 | 276      | 1         | 4         |
| South Asian     | 0                 | 15       | 0         | 0         |

**Supplemental Table 7.** Primary and secondary signals, by race/ethnicity, for a GWAS of Lp(a). Secondary signals are retained if *P*-value is <5x10<sup>-9</sup> and the variant is independent of other index variants (*r*<sup>2</sup><0.1).

| Race/ethnicity | SNP ID            | Chr | BP        | Index allele | Frequency | Beta*   | SE*    | P-value* |
|----------------|-------------------|-----|-----------|--------------|-----------|---------|--------|----------|
| African        | 6:161010118:A_G   | 6   | 161010118 | A            | 0.9882    | -1.0337 | 0.0599 | 1.24E-66 |
|                | 6:160986280:A_G   | 6   | 160986280 | A            | 0.0294    | 0.7916  | 0.0465 | 5.16E-65 |
|                | 6:161206375:G_T   | 6   | 161206375 | T            | 0.986     | 0.8037  | 0.0550 | 2.82E-48 |
|                | 6:161022169:C_T   | 6   | 161022169 | T            | 0.9785    | -0.7777 | 0.0534 | 5.02E-48 |
|                | 6:161031253:C_T   | 6   | 161031253 | T            | 0.1428    | -0.2514 | 0.0197 | 2.71E-37 |
|                | 6:161016666:C_CTT | 6   | 161016666 | CTT          | 0.9249    | 0.2884  | 0.0249 | 4.02E-31 |
|                | 6:160650281:A_C   | 6   | 160650281 | A            | 0.0078    | 2.1195  | 0.1859 | 4.00E-30 |
|                | 6:160794891:C_G   | 6   | 160794891 | C            | 0.9897    | -0.7258 | 0.0670 | 2.56E-27 |
|                | 6:161087440:A_G   | 6   | 161087440 | A            | 0.0494    | 0.3915  | 0.0376 | 2.32E-25 |
|                | 6:161092884:A_G   | 6   | 161092884 | A            | 0.9939    | -0.9511 | 0.0923 | 6.91E-25 |
|                | 6:160942197:G_T   | 6   | 160942197 | T            | 0.9928    | 0.8944  | 0.0872 | 1.11E-24 |
|                | 6:161067949:C_G   | 6   | 161067949 | C            | 0.6107    | 0.2038  | 0.0201 | 4.00E-24 |
|                | 6:161164187:A_C   | 6   | 161164187 | A            | 0.8928    | -0.1895 | 0.0193 | 1.19E-22 |
|                | 6:161017363:A_G   | 6   | 161017363 | A            | 0.0361    | 0.3415  | 0.0352 | 2.62E-22 |
|                | 6:160608101:C_T   | 6   | 160608101 | T            | 0.0057    | -2.0618 | 0.2180 | 3.21E-21 |
|                | 6:160999154:G_T   | 6   | 160999154 | T            | 0.9557    | -0.2764 | 0.0297 | 1.37E-20 |
|                | 6:161005103:C_CT  | 6   | 161005103 | CT           | 0.967     | 0.3034  | 0.0327 | 1.80E-20 |
|                | 6:160775652:G_T   | 6   | 160775652 | T            | 0.4167    | 0.1154  | 0.0127 | 1.36E-19 |
|                | 6:160986915:A_C   | 6   | 160986915 | A            | 0.0417    | -0.2945 | 0.0331 | 5.61E-19 |
|                | 6:160595654:A_G   | 6   | 160595654 | A            | 0.0771    | -0.1982 | 0.0227 | 2.57E-18 |
|                | 6:161113698:C_T   | 6   | 161113698 | T            | 0.0447    | 0.2649  | 0.0307 | 6.26E-18 |
|                | 6:161114553:A_G   | 6   | 161114553 | A            | 0.9776    | 0.3912  | 0.0455 | 8.44E-18 |
|                | 6:160698826:C_T   | 6   | 160698826 | T            | 0.1881    | 0.1429  | 0.0171 | 6.08E-17 |
|                | 6:161119578:C_T   | 6   | 161119578 | T            | 0.9595    | -0.2622 | 0.0322 | 4.22E-16 |
|                | 6:161100997:G_T   | 6   | 161100997 | T            | 0.0208    | 0.5204  | 0.0646 | 7.84E-16 |
|                | 6:161366947:A_G   | 6   | 161366947 | A            | 0.1961    | 0.1389  | 0.0173 | 1.11E-15 |
|                | 6:161028667:A_G   | 6   | 161028667 | A            | 0.8243    | -0.1479 | 0.0188 | 3.48E-15 |
|                | 6:160991306:A_G   | 6   | 160991306 | A            | 0.0232    | -0.3325 | 0.0427 | 6.75E-15 |
|                | 6:161086111:A_G   | 6   | 161086111 | A            | 0.9865    | 0.4476  | 0.0590 | 3.44E-14 |
|                | 6:161240841:A_C   | 6   | 161240841 | A            | 0.8989    | -0.1445 | 0.0195 | 1.29E-13 |
|                | 6:160929812:C_G   | 6   | 160929812 | C            | 0.0557    | 0.2012  | 0.0278 | 4.45E-13 |
|                | 6:161020158:A_G   | 6   | 161020158 | A            | 0.009     | 0.9252  | 0.1301 | 1.13E-12 |
|                | 6:160810118:C_T   | 6   | 160810118 | T            | 0.0115    | 0.6961  | 0.1004 | 4.05E-12 |
|                | 6:160991302:G_T   | 6   | 160991302 | T            | 0.9732    | 0.2839  | 0.0411 | 5.07E-12 |
|                | 6:161013013:C_T   | 6   | 161013013 | T            | 0.9916    | -0.7440 | 0.1140 | 6.76E-11 |
|                | 6:161723526:C_T   | 6   | 161723526 | T            | 0.9291    | 0.2250  | 0.0346 | 7.46E-11 |
|                | 6:161125102:C_T   | 6   | 161125102 | T            | 0.9929    | -0.9176 | 0.1473 | 4.74E-10 |
|                | 6:160882589:A_G   | 6   | 160882589 | A            | 0.8838    | 0.1182  | 0.0193 | 8.85E-10 |
|                | 6:160534942:C_T   | 6   | 160534942 | T            | 0.9928    | -0.9064 | 0.1497 | 1.39E-09 |
|                | 9:12728543:C_T    | 9   | 12728543  | T            | 0.9674    | -0.1925 | 0.0326 | 3.66E-09 |
|                | 19:45412079:C_T   | 19  | 45412079  | T            | 0.1098    | -0.2592 | 0.0193 | 4.72E-41 |
| East Asian     | 6:161018174:C_T   | 6   | 161018174 | T            | 0.8836    | -0.6832 | 0.0446 | 6.17E-53 |
|                | 6:161087863:C_T   | 6   | 161087863 | T            | 0.7738    | 0.2462  | 0.0339 | 3.71E-13 |
|                | 6:160910517:A_T   | 6   | 160910517 | A            | 0.0327    | 0.4592  | 0.0737 | 4.73E-10 |
| European       | 1:109822166:A_G   | 1   | 109822166 | A            | 0.7725    | 0.0248  | 0.0035 | 1.39E-12 |
|                | 2:211540507:A_C   | 2   | 211540507 | A            | 0.3156    | -0.0257 | 0.0031 | 1.14E-16 |
|                | 2:64773731:A_C    | 2   | 64773731  | A            | 0.9932    | 0.1211  | 0.0201 | 1.70E-09 |
|                | 2:172266423:C_T   | 2   | 172266423 | T            | 0.0112    | 0.0874  | 0.0147 | 2.76E-09 |
|                | 3:135812523:G_T   | 3   | 135812523 | T            | 0.2304    | 0.0208  | 0.0035 | 2.81E-09 |
|                | 4:174514218:A_C   | 4   | 174514218 | A            | 0.9847    | -0.0773 | 0.0129 | 2.07E-09 |
|                | 5:55495591:A_G    | 5   | 55495591  | A            | 0.0059    | -0.1270 | 0.0211 | 1.76E-09 |
|                | 6:160610902:C_T   | 6   | 160610902 | T            | 0.9924    | -0.9600 | 0.0247 | <1E-300  |
|                | 6:160627001:C_G   | 6   | 160627001 | C            | 0.147     | -0.2398 | 0.0061 | <1E-300  |
|                | 6:160697628:G_T   | 6   | 160697628 | T            | 0.2939    | 0.2366  | 0.0057 | <1E-300  |
|                | 6:160721376:A_T   | 6   | 160721376 | A            | 0.9427    | -0.3790 | 0.0084 | <1E-300  |
|                | 6:160727799:A_G   | 6   | 160727799 | A            | 0.9839    | -0.9739 | 0.0190 | <1E-300  |
|                | 6:160789296:A_G   | 6   | 160789296 | A            | 0.7117    | 0.2904  | 0.0061 | <1E-300  |
|                | 6:160822756:A_T   | 6   | 160822756 | A            | 0.0389    | 0.9555  | 0.0150 | <1E-300  |
|                | 6:160842725:A_G   | 6   | 160842725 | A            | 0.907     | -0.7592 | 0.0098 | <1E-300  |
|                | 6:160868121:A_G   | 6   | 160868121 | A            | 0.0294    | -1.2331 | 0.0189 | <1E-300  |
|                | 6:160888021:G_T   | 6   | 160888021 | T            | 0.1188    | -0.7611 | 0.0103 | <1E-300  |
|                | 6:160894448:A_G   | 6   | 160894448 | A            | 0.9716    | 0.4333  | 0.0108 | <1E-300  |
|                | 6:160903421:A_G   | 6   | 160903421 | A            | 0.0101    | 0.9987  | 0.0203 | <1E-300  |
|                | 6:160915695:A_C   | 6   | 160915695 | A            | 0.0332    | 0.7394  | 0.0135 | <1E-300  |
|                | 6:160953137:C_T   | 6   | 160953137 | T            | 0.9824    | -0.6420 | 0.0144 | <1E-300  |
|                | 6:160974578:A_G   | 6   | 160974578 | A            | 0.1413    | 0.3988  | 0.0075 | <1E-300  |

|                    |   |           |     |        |         |        |           |
|--------------------|---|-----------|-----|--------|---------|--------|-----------|
| 6:160976262:C_T    | 6 | 160976262 | T   | 0.9892 | 0.8183  | 0.0191 | <1E-300   |
| 6:160980330:C_T    | 6 | 160980330 | T   | 0.4771 | 0.4148  | 0.0052 | <1E-300   |
| 6:161027131:A_C    | 6 | 161027131 | A   | 0.9927 | 0.8728  | 0.0207 | <1E-300   |
| 6:161071982:A_G    | 6 | 161071982 | A   | 0.0638 | -0.5145 | 0.0100 | <1E-300   |
| 6:161078754:A_G    | 6 | 161078754 | A   | 0.016  | -0.8697 | 0.0177 | <1E-300   |
| 6:161097590:A_T    | 6 | 161097590 | A   | 0.8416 | 0.6813  | 0.0115 | <1E-300   |
| 6:161105200:A_G    | 6 | 161105200 | A   | 0.8299 | -0.7215 | 0.0104 | <1E-300   |
| 6:161118190:G_T    | 6 | 161118190 | T   | 0.9945 | 1.1445  | 0.0260 | <1E-300   |
| 6:161257961:A_G    | 6 | 161257961 | A   | 0.5566 | 0.2257  | 0.0047 | <1E-300   |
| 6:161280379:C_T    | 6 | 161280379 | T   | 0.1912 | 0.3727  | 0.0067 | <1E-300   |
| 6:161475692:A_T    | 6 | 161475692 | A   | 0.0072 | 1.0530  | 0.0205 | <1E-300   |
| 6:160991737:A_C    | 6 | 160991737 | A   | 0.015  | 0.5541  | 0.0151 | 5.98E-295 |
| 6:161154450:A_G    | 6 | 161154450 | A   | 0.0297 | -0.3912 | 0.0108 | 4.70E-286 |
| 6:161106730:G_T    | 6 | 161106730 | T   | 0.01   | -0.6892 | 0.0191 | 3.75E-285 |
| 6:160712481:A_G    | 6 | 160712481 | A   | 0.0167 | 0.4639  | 0.0131 | 1.49E-273 |
| 6:161112805:A_G    | 6 | 161112805 | A   | 0.0162 | 0.4952  | 0.0141 | 2.62E-268 |
| 6:160877594:G_T    | 6 | 160877594 | T   | 0.008  | 0.6960  | 0.0201 | 3.33E-262 |
| 6:160642103:C_G    | 6 | 160642103 | C   | 0.2393 | 0.1766  | 0.0052 | 1.54E-255 |
| 6:161231196:A_G    | 6 | 161231196 | A   | 0.0102 | -0.5693 | 0.0167 | 7.30E-255 |
| 6:161127501:A_G    | 6 | 161127501 | A   | 0.9944 | 0.7682  | 0.0225 | 8.70E-255 |
| 6:160910517:A_T    | 6 | 160910517 | A   | 0.04   | -0.5131 | 0.0151 | 2.70E-254 |
| 6:161286623:A_G    | 6 | 161286623 | A   | 0.0076 | 0.6613  | 0.0195 | 5.32E-253 |
| 6:160699471:C_T    | 6 | 160699471 | T   | 0.9919 | 0.9672  | 0.0285 | 8.67E-252 |
| 6:161608252:A_G    | 6 | 161608252 | A   | 0.0879 | -0.2468 | 0.0073 | 3.27E-250 |
| 6:160697866:C_G    | 6 | 160697866 | C   | 0.9885 | -0.6289 | 0.0188 | 6.16E-245 |
| 6:161078894:C_T    | 6 | 161078894 | T   | 0.9912 | -0.5798 | 0.0174 | 7.76E-245 |
| 6:160734662:A_G    | 6 | 160734662 | A   | 0.9924 | 0.6409  | 0.0195 | 1.63E-237 |
| 6:161632692:C_T    | 6 | 161632692 | T   | 0.9916 | -0.6031 | 0.0184 | 4.77E-235 |
| 6:161237578:C_CA   | 6 | 161237578 | CA  | 0.7929 | -0.1804 | 0.0056 | 1.27E-228 |
| 6:161272446:A_G    | 6 | 161272446 | A   | 0.0242 | -0.5956 | 0.0185 | 8.49E-228 |
| 6:160975629:A_G    | 6 | 160975629 | A   | 0.025  | -0.4438 | 0.0138 | 2.08E-227 |
| 6:161186302:A_G    | 6 | 161186302 | A   | 0.9548 | 0.2877  | 0.0091 | 2.12E-221 |
| 6:161548026:A_G    | 6 | 161548026 | A   | 0.0065 | 0.6943  | 0.0222 | 2.73E-214 |
| 6:161124143:G_T    | 6 | 161124143 | T   | 0.0233 | -0.3804 | 0.0122 | 3.09E-213 |
| 6:160710480:A_G    | 6 | 160710480 | A   | 0.0272 | -0.4328 | 0.0142 | 6.56E-205 |
| 6:161125631:C_T    | 6 | 161125631 | T   | 0.7658 | -0.1960 | 0.0064 | 5.29E-204 |
| 6:161618071:A_G    | 6 | 161618071 | A   | 0.0125 | 0.4582  | 0.0151 | 2.40E-203 |
| 6:161339399:A_G    | 6 | 161339399 | A   | 0.9731 | 0.3600  | 0.0119 | 1.70E-202 |
| 6:160952816:C_T    | 6 | 160952816 | T   | 0.9852 | 0.5368  | 0.0179 | 6.81E-198 |
| 6:160841075:A_G    | 6 | 160841075 | A   | 0.0144 | -0.5460 | 0.0183 | 5.19E-196 |
| 6:160599325:A_AAG  | 6 | 160599325 | A   | 0.6377 | 0.1226  | 0.0041 | 5.10E-195 |
| 6:161017825:C_T    | 6 | 161017825 | T   | 0.0053 | -0.7300 | 0.0246 | 5.72E-194 |
| 6:161640802:C_T    | 6 | 161640802 | T   | 0.0168 | 0.3887  | 0.0133 | 1.60E-187 |
| 6:161159619:C_T    | 6 | 161159619 | T   | 0.9936 | 0.7021  | 0.0241 | 1.89E-186 |
| 6:161074983:A_T    | 6 | 161074983 | A   | 0.0375 | -0.2975 | 0.0104 | 5.62E-180 |
| 6:161147619:T_TA   | 6 | 161147619 | T   | 0.9944 | -0.6285 | 0.0220 | 6.37E-179 |
| 6:160231601:C_G    | 6 | 160231601 | C   | 0.0316 | -0.2791 | 0.0098 | 1.74E-177 |
| 6:160938131:A_C    | 6 | 160938131 | A   | 0.0105 | 0.5039  | 0.0184 | 7.12E-166 |
| 6:161330808:C_G    | 6 | 161330808 | C   | 0.0069 | -0.5633 | 0.0206 | 2.57E-165 |
| 6:161236385:C_T    | 6 | 161236385 | T   | 0.982  | -0.6101 | 0.0223 | 7.70E-165 |
| 6:161206068:A_G    | 6 | 161206068 | A   | 0.0104 | -0.4631 | 0.0170 | 3.09E-164 |
| 6:160809918:A_G    | 6 | 160809918 | A   | 0.0075 | -0.5521 | 0.0202 | 1.13E-163 |
| 6:160696919:C_T    | 6 | 160696919 | T   | 0.0717 | 0.2632  | 0.0097 | 1.74E-162 |
| 6:161285786:C_T    | 6 | 161285786 | T   | 0.9903 | 0.5333  | 0.0198 | 3.41E-159 |
| 6:161556852:C_T    | 6 | 161556852 | T   | 0.0476 | -0.2140 | 0.0080 | 1.08E-158 |
| 6:161225253:A_G    | 6 | 161225253 | A   | 0.992  | 0.6081  | 0.0229 | 2.00E-155 |
| 6:160818614:A_C    | 6 | 160818614 | A   | 0.9949 | 0.6299  | 0.0239 | 5.96E-153 |
| 6:160953642:A_G    | 6 | 160953642 | A   | 0.9833 | 0.4602  | 0.0180 | 7.86E-144 |
| 6:160469853:C_CAA  | 6 | 160469853 | CAA | 0.9599 | 0.2139  | 0.0084 | 2.01E-143 |
| 6:160966409:C_T    | 6 | 160966409 | T   | 0.6627 | 0.1404  | 0.0056 | 2.27E-139 |
| 6:160628128:C_T    | 6 | 160628128 | T   | 0.0121 | -0.4397 | 0.0175 | 5.82E-139 |
| 6:161127106:C_T    | 6 | 161127106 | T   | 0.0157 | -0.4013 | 0.0161 | 1.15E-136 |
| 6:161645205:C_T    | 6 | 161645205 | T   | 0.174  | -0.1181 | 0.0048 | 5.54E-136 |
| 6:160287100:G_GTTT | 6 | 160287100 | G   | 0.833  | 0.1160  | 0.0047 | 2.92E-132 |
| 6:161126323:C_T    | 6 | 161126323 | T   | 0.0626 | -0.1942 | 0.0079 | 8.08E-132 |
| 6:161024293:C_T    | 6 | 161024293 | T   | 0.2453 | -0.1173 | 0.0049 | 6.22E-126 |
| 6:161351132:C_T    | 6 | 161351132 | T   | 0.0056 | -0.5360 | 0.0226 | 2.24E-124 |
| 6:160592112:A_G    | 6 | 160592112 | A   | 0.0074 | -0.4742 | 0.0202 | 6.97E-122 |
| 6:160707986:C_T    | 6 | 160707986 | T   | 0.9818 | -0.3066 | 0.0132 | 1.50E-119 |
| 6:161068235:A_T    | 6 | 161068235 | A   | 0.987  | 0.3450  | 0.0149 | 6.40E-118 |



|                                |   |           |      |        |         |        |           |
|--------------------------------|---|-----------|------|--------|---------|--------|-----------|
| 6:160444632:A_G                | 6 | 160444632 | A    | 0.0064 | 0.5407  | 0.0235 | 7.71E-117 |
| 6:160643819:C_T                | 6 | 160643819 | T    | 0.1738 | -0.1229 | 0.0054 | 1.23E-115 |
| 6:161534516:A_G                | 6 | 161534516 | A    | 0.9916 | 0.4452  | 0.0196 | 6.81E-114 |
| 6:161478381:C_T                | 6 | 161478381 | T    | 0.9936 | -0.4398 | 0.0200 | 1.29E-107 |
| 6:160906922:G_T                | 6 | 160906922 | T    | 0.043  | -0.2745 | 0.0125 | 6.33E-107 |
| 6:161565731:C_G                | 6 | 161565731 | C    | 0.9945 | 0.5059  | 0.0232 | 4.30E-105 |
| 6:160300221:A_G                | 6 | 160300221 | A    | 0.2314 | -0.0918 | 0.0042 | 1.75E-104 |
| 6:160475532:C_CGTT             | 6 | 160475532 | CGTT | 0.9943 | -0.4888 | 0.0226 | 1.65E-103 |
| 6:160505317:A_G                | 6 | 160505317 | A    | 0.9921 | 0.4819  | 0.0224 | 1.11E-102 |
| 6:159956709:C_G                | 6 | 159956709 | C    | 0.0327 | 0.1949  | 0.0091 | 3.06E-101 |
| 6:161352234:A_G                | 6 | 161352234 | A    | 0.034  | -0.2149 | 0.0101 | 3.63E-101 |
| 6:160251955:C_T                | 6 | 160251955 | T    | 0.6969 | 0.0813  | 0.0038 | 1.82E-100 |
| 6:161544035:A_G                | 6 | 161544035 | A    | 0.038  | 0.2230  | 0.0105 | 2.73E-100 |
| 6:161490712:G_T                | 6 | 161490712 | T    | 0.9918 | -0.4057 | 0.0192 | 3.66E-99  |
| 6:161294759:G_GCA              | 6 | 161294759 | G    | 0.8963 | 0.1465  | 0.0069 | 1.03E-98  |
| 6:161389720:A_G                | 6 | 161389720 | A    | 0.0059 | 0.4718  | 0.0225 | 6.14E-98  |
| 6:160185151:A_C                | 6 | 160185151 | A    | 0.9817 | -0.2679 | 0.0128 | 2.23E-97  |
| 6:161299811:A_G                | 6 | 161299811 | A    | 0.9769 | 0.2622  | 0.0127 | 2.06E-94  |
| 6:161172374:C_T                | 6 | 161172374 | T    | 0.0147 | -0.3037 | 0.0149 | 3.89E-92  |
| 6:161004630:C_T                | 6 | 161004630 | T    | 0.9939 | 0.4622  | 0.0228 | 1.08E-91  |
| 6:160918070:G_GT               | 6 | 160918070 | G    | 0.0325 | 0.2555  | 0.0126 | 9.33E-91  |
| 6:161006979:T_TAAAC            | 6 | 161006979 | T    | 0.0106 | -0.4260 | 0.0211 | 2.12E-90  |
| 6:160740880:A_G                | 6 | 160740880 | A    | 0.0075 | -0.4142 | 0.0207 | 3.65E-89  |
| 6:160955713:G_T                | 6 | 160955713 | T    | 0.0227 | 0.2486  | 0.0124 | 7.19E-89  |
| 6:161005272:C_T                | 6 | 161005272 | T    | 0.0724 | 0.1482  | 0.0074 | 8.70E-89  |
| 6:160455976:A_G                | 6 | 160455976 | A    | 0.9542 | 0.1605  | 0.0081 | 1.88E-88  |
| 6:160915513:C_G                | 6 | 160915513 | C    | 0.9888 | 0.3595  | 0.0182 | 6.08E-87  |
| 6:160486533:C_T                | 6 | 160486533 | T    | 0.0061 | -0.5379 | 0.0272 | 7.19E-87  |
| 6:161606358:C_T                | 6 | 161606358 | T    | 0.0098 | -0.3385 | 0.0172 | 2.04E-86  |
| 6:161089817:A_G                | 6 | 161089817 | A    | 0.1653 | 0.1501  | 0.0077 | 1.40E-85  |
| 6:161312655:C_T                | 6 | 161312655 | T    | 0.9239 | -0.1728 | 0.0089 | 2.15E-83  |
| 6:161565180:A_G                | 6 | 161565180 | A    | 0.0261 | -0.2293 | 0.0119 | 1.88E-82  |
| 6:161278005:G_T                | 6 | 161278005 | T    | 0.9946 | 0.4336  | 0.0226 | 5.57E-82  |
| 6:160310512:C_T                | 6 | 160310512 | T    | 0.006  | -0.4504 | 0.0236 | 2.56E-81  |
| 6:161157310:C_T                | 6 | 161157310 | T    | 0.0125 | -0.2801 | 0.0148 | 5.53E-80  |
| 6:160529016:A_G                | 6 | 160529016 | A    | 0.0081 | -0.4625 | 0.0245 | 2.35E-79  |
| 6:161689812:G_GTCCA<br>TATAATT | 6 | 161689812 | G    | 0.8102 | -0.0813 | 0.0044 | 1.10E-77  |
| 6:161480419:C_T                | 6 | 161480419 | T    | 0.9945 | 0.4057  | 0.0219 | 1.15E-76  |
| 6:161366675:C_G                | 6 | 161366675 | C    | 0.9852 | -0.2692 | 0.0145 | 1.72E-76  |
| 6:159754524:C_CA               | 6 | 159754524 | CA   | 0.1211 | -0.0892 | 0.0048 | 2.72E-76  |
| 6:161215480:A_G                | 6 | 161215480 | A    | 0.9949 | -0.4523 | 0.0246 | 3.24E-75  |
| 6:160655331:C_G                | 6 | 160655331 | C    | 0.0126 | 0.2828  | 0.0156 | 2.35E-73  |
| 6:169290804:C_T                | 6 | 169290804 | T    | 0.0061 | -0.3628 | 0.0201 | 1.70E-72  |
| 6:161320210:A_G                | 6 | 161320210 | A    | 0.2907 | -0.0885 | 0.0049 | 1.71E-72  |
| 6:160401264:A_G                | 6 | 160401264 | A    | 0.9335 | 0.1287  | 0.0072 | 1.64E-71  |
| 6:161453525:C_T                | 6 | 161453525 | T    | 0.0134 | 0.2625  | 0.0147 | 1.80E-71  |
| 6:161101714:A_G                | 6 | 161101714 | A    | 0.9924 | 0.3602  | 0.0202 | 3.78E-71  |
| 6:160907681:A_G                | 6 | 160907681 | A    | 0.0051 | -0.4494 | 0.0254 | 2.67E-70  |
| 6:159958502:A_C                | 6 | 159958502 | A    | 0.0288 | 0.1867  | 0.0106 | 8.30E-70  |
| 6:166966915:A_C                | 6 | 166966915 | A    | 0.9927 | 0.3088  | 0.0180 | 2.61E-66  |
| 6:160426622:C_T                | 6 | 160426622 | T    | 0.0273 | 0.1691  | 0.0099 | 4.39E-65  |
| 6:160604202:C_T                | 6 | 160604202 | T    | 0.0055 | -0.4070 | 0.0241 | 6.97E-64  |
| 6:160489092:T_TGG              | 6 | 160489092 | T    | 0.8965 | -0.0953 | 0.0057 | 4.74E-63  |
| 6:161989710:C_T                | 6 | 161989710 | T    | 0.6812 | -0.0543 | 0.0033 | 1.61E-60  |
| 6:167599101:A_G                | 6 | 167599101 | A    | 0.3165 | -0.0534 | 0.0033 | 1.50E-59  |
| 6:160633223:A_G                | 6 | 160633223 | A    | 0.0274 | -0.1805 | 0.0113 | 1.56E-57  |
| 6:162808219:A_G                | 6 | 162808219 | A    | 0.0061 | 0.3067  | 0.0194 | 3.03E-56  |
| 6:161155264:C_T                | 6 | 161155264 | T    | 0.9836 | 0.2408  | 0.0153 | 1.61E-55  |
| 6:161368353:A_G                | 6 | 161368353 | A    | 0.0475 | -0.1563 | 0.0100 | 5.44E-55  |
| 6:160783782:C_T                | 6 | 160783782 | T    | 0.0153 | 0.2557  | 0.0164 | 7.15E-55  |
| 6:167813541:C_T                | 6 | 167813541 | T    | 0.0073 | -0.3012 | 0.0193 | 1.26E-54  |
| 6:161727383:A_T                | 6 | 161727383 | A    | 0.0083 | 0.2856  | 0.0184 | 1.80E-54  |
| 6:161314984:C_T                | 6 | 161314984 | T    | 0.9902 | 0.2997  | 0.0194 | 7.70E-54  |
| 6:160712416:A_T                | 6 | 160712416 | A    | 0.9492 | 0.1589  | 0.0103 | 9.62E-54  |
| 6:161700177:A_G                | 6 | 161700177 | A    | 0.9693 | -0.1483 | 0.0096 | 2.49E-53  |
| 6:166157448:C_T                | 6 | 166157448 | T    | 0.01   | -0.2552 | 0.0166 | 2.77E-53  |
| 6:161491684:G_T                | 6 | 161491684 | T    | 0.006  | 0.3242  | 0.0212 | 1.11E-52  |
| 6:151591640:C_T                | 6 | 151591640 | T    | 0.9868 | -0.2023 | 0.0133 | 1.33E-52  |
| 6:161279121:G_T                | 6 | 161279121 | T    | 0.9949 | -0.3633 | 0.0239 | 2.68E-52  |

|                                 |   |           |    |        |         |        |          |
|---------------------------------|---|-----------|----|--------|---------|--------|----------|
| 6:162723021:C_T                 | 6 | 162723021 | T  | 0.9352 | -0.0921 | 0.0061 | 1.77E-51 |
| 6:160180003:C_T                 | 6 | 160180003 | T  | 0.0068 | 0.3057  | 0.0203 | 4.70E-51 |
| 6:167732122:A_C                 | 6 | 167732122 | A  | 0.2747 | 0.0545  | 0.0036 | 1.05E-50 |
| 6:162254160:A_G                 | 6 | 162254160 | A  | 0.3763 | 0.0468  | 0.0031 | 1.89E-50 |
| 6:160761788:C_T                 | 6 | 160761788 | T  | 0.0059 | -0.3661 | 0.0245 | 2.29E-50 |
| 6:154484259:A_G                 | 6 | 154484259 | A  | 0.011  | -0.2117 | 0.0145 | 1.63E-48 |
| 6:160575008:C_G                 | 6 | 160575008 | C  | 0.9886 | 0.2567  | 0.0176 | 2.06E-48 |
| 6:155231603:C_T                 | 6 | 155231603 | T  | 0.0056 | -0.3252 | 0.0223 | 4.52E-48 |
| 6:161998222:A_G                 | 6 | 161998222 | A  | 0.9948 | 0.3216  | 0.0221 | 7.88E-48 |
| 6:169914012:C_T                 | 6 | 169914012 | T  | 0.0053 | 0.3270  | 0.0226 | 1.66E-47 |
| 6:159955911:A_G                 | 6 | 159955911 | A  | 0.0051 | -0.3399 | 0.0236 | 6.13E-47 |
| 6:160412524:A_G                 | 6 | 160412524 | A  | 0.0085 | -0.2450 | 0.0170 | 6.22E-47 |
| 6:156104230:A_G                 | 6 | 156104230 | A  | 0.9852 | 0.1831  | 0.0128 | 2.95E-46 |
| 6:156771172:C_T                 | 6 | 156771172 | T  | 0.0061 | -0.2919 | 0.0206 | 1.04E-45 |
| 6:162639223:C_T                 | 6 | 162639223 | T  | 0.0468 | 0.1049  | 0.0074 | 1.13E-45 |
| 6:153219139:C_T                 | 6 | 153219139 | T  | 0.0126 | 0.1981  | 0.0140 | 1.25E-45 |
| 6:165822976:C_T                 | 6 | 165822976 | T  | 0.0415 | -0.1108 | 0.0079 | 8.19E-45 |
| 6:158739931:A_ATTTT<br>TTTTT    | 6 | 158739931 | A  | 0.9392 | 0.0897  | 0.0064 | 8.37E-45 |
| 6:152794383:C_T                 | 6 | 152794383 | T  | 0.9727 | -0.1277 | 0.0091 | 1.10E-44 |
| 6:156936954:C_T                 | 6 | 156936954 | T  | 0.0367 | 0.1109  | 0.0079 | 1.13E-44 |
| 6:152775812:C_T                 | 6 | 152775812 | T  | 0.0063 | 0.2918  | 0.0208 | 1.48E-44 |
| 6:160340256:A_C                 | 6 | 160340256 | A  | 0.9873 | -0.2072 | 0.0148 | 1.86E-44 |
| 6:160258860:C_G                 | 6 | 160258860 | C  | 0.0212 | 0.1560  | 0.0112 | 1.87E-44 |
| 6:166522384:A_C                 | 6 | 166522384 | A  | 0.9929 | 0.2587  | 0.0185 | 2.77E-44 |
| 6:160606105:A_G                 | 6 | 160606105 | A  | 0.9613 | 0.1360  | 0.0097 | 2.99E-44 |
| 6:158570503:C_G                 | 6 | 158570503 | C  | 0.9903 | -0.2228 | 0.0160 | 5.07E-44 |
| 6:156788129:C_CA                | 6 | 156788129 | CA | 0.8298 | -0.0563 | 0.0041 | 8.56E-44 |
| 6:163565779:C_T                 | 6 | 163565779 | T  | 0.1256 | 0.0632  | 0.0046 | 8.90E-44 |
| 6:159430012:A_G                 | 6 | 159430012 | A  | 0.9859 | 0.1815  | 0.0131 | 1.19E-43 |
| 6:160467243:A_G                 | 6 | 160467243 | A  | 0.9897 | 0.2338  | 0.0169 | 1.32E-43 |
| 6:161656909:C_G                 | 6 | 161656909 | C  | 0.0187 | -0.1647 | 0.0119 | 1.80E-43 |
| 6:161551024:A_G                 | 6 | 161551024 | A  | 0.0834 | -0.0919 | 0.0067 | 1.93E-43 |
| 6:166366905:C_T                 | 6 | 166366905 | T  | 0.0186 | -0.1540 | 0.0111 | 1.93E-43 |
| 6:161709278:A_G                 | 6 | 161709278 | A  | 0.017  | 0.1782  | 0.0129 | 2.08E-43 |
| 6:161751750:G_T                 | 6 | 161751750 | T  | 0.9933 | 0.2684  | 0.0195 | 3.16E-43 |
| 6:151724302:A_G                 | 6 | 151724302 | A  | 0.9943 | -0.3005 | 0.0218 | 3.22E-43 |
| 6:160159702:A_G                 | 6 | 160159702 | A  | 0.0079 | -0.2599 | 0.0189 | 5.13E-43 |
| 6:164993256:A_C                 | 6 | 164993256 | A  | 0.9898 | -0.2216 | 0.0162 | 1.09E-42 |
| 6:153090789:A_G                 | 6 | 153090789 | A  | 0.9901 | 0.2202  | 0.0161 | 1.16E-42 |
| 6:162280076:A_G                 | 6 | 162280076 | A  | 0.7117 | 0.0443  | 0.0033 | 7.24E-42 |
| 6:161830218:C_T                 | 6 | 161830218 | T  | 0.0062 | 0.2856  | 0.0212 | 1.66E-41 |
| 6:165198415:C_T                 | 6 | 165198415 | T  | 0.0103 | 0.2077  | 0.0154 | 1.66E-41 |
| 6:161343833:A_G                 | 6 | 161343833 | A  | 0.0065 | 0.2838  | 0.0211 | 2.75E-41 |
| 6:155513629:C_T                 | 6 | 155513629 | T  | 0.0301 | -0.1205 | 0.0090 | 2.84E-41 |
| 6:160180095:A_C                 | 6 | 160180095 | A  | 0.0084 | -0.2469 | 0.0185 | 7.90E-41 |
| 6:170379025:C_T                 | 6 | 170379025 | T  | 0.1355 | -0.0580 | 0.0043 | 1.43E-40 |
| 6:159134426:C_T                 | 6 | 159134426 | T  | 0.0113 | 0.1943  | 0.0146 | 2.66E-40 |
| 6:161330413:C_T                 | 6 | 161330413 | T  | 0.0069 | 0.2642  | 0.0199 | 3.35E-40 |
| 6:161712208:C_T                 | 6 | 161712208 | T  | 0.9929 | 0.2759  | 0.0208 | 3.67E-40 |
| 6:155378316:C_T                 | 6 | 155378316 | T  | 0.024  | -0.1322 | 0.0100 | 4.49E-40 |
| 6:160427234:A_C                 | 6 | 160427234 | A  | 0.0075 | 0.3048  | 0.0231 | 6.88E-40 |
| 6:162280401:C_T                 | 6 | 162280401 | T  | 0.0136 | -0.1799 | 0.0136 | 9.25E-40 |
| 6:157637814:A_G                 | 6 | 157637814 | A  | 0.3604 | 0.0427  | 0.0032 | 1.66E-39 |
| 6:166365978:C_T                 | 6 | 166365978 | T  | 0.0132 | -0.1733 | 0.0132 | 4.43E-39 |
| 6:161010118:A_G                 | 6 | 161010118 | A  | 0.9333 | -0.3663 | 0.0281 | 7.94E-39 |
| 6:162696500:A_C                 | 6 | 162696500 | A  | 0.0083 | -0.2199 | 0.0169 | 1.24E-38 |
| 6:158838475:A_G                 | 6 | 158838475 | A  | 0.0052 | 0.2902  | 0.0223 | 1.42E-38 |
| 6:166133878:C_T                 | 6 | 166133878 | T  | 0.0482 | -0.0911 | 0.0070 | 1.65E-38 |
| 6:159888248:C_T                 | 6 | 159888248 | T  | 0.199  | 0.0510  | 0.0039 | 2.71E-38 |
| 6:161307185:C_T                 | 6 | 161307185 | T  | 0.9842 | 0.1758  | 0.0136 | 3.56E-38 |
| 6:151845594:A_T                 | 6 | 151845594 | A  | 0.9721 | 0.1176  | 0.0091 | 3.61E-38 |
| 6:152626726:C_T                 | 6 | 152626726 | T  | 0.0083 | -0.2227 | 0.0173 | 7.36E-38 |
| 6:164982125:A_T                 | 6 | 164982125 | A  | 0.0212 | -0.1341 | 0.0104 | 8.04E-38 |
| 6:169461339:A_ATATT<br>ATTAT    | 6 | 169461339 | A  | 0.812  | -0.0494 | 0.0038 | 9.90E-38 |
| 6:159730210:C_G                 | 6 | 159730210 | C  | 0.9916 | -0.2298 | 0.0179 | 1.08E-37 |
| 6:151566735:G_GCACC<br>ACTGCAGT | 6 | 151566735 | G  | 0.583  | 0.0386  | 0.0030 | 5.49E-37 |
| 6:161006077:C_T                 | 6 | 161006077 | T  | 0.0318 | -0.5223 | 0.0411 | 6.50E-37 |

|                     |    |           |       |        |         |        |           |
|---------------------|----|-----------|-------|--------|---------|--------|-----------|
| 6:161724214:A_G     | 6  | 161724214 | A     | 0.0231 | 0.1304  | 0.0103 | 6.51E-37  |
| 6:161769835:C_T     | 6  | 161769835 | T     | 0.9002 | -0.0642 | 0.0051 | 7.34E-37  |
| 6:157954366:T_TATG  | 6  | 157954366 | T     | 0.007  | 0.2436  | 0.0192 | 9.71E-37  |
| 6:151261708:C_CTTT  | 6  | 151261708 | CTTTA | 0.2886 | 0.0419  | 0.0033 | 2.47E-36  |
| A                   |    |           |       |        |         |        |           |
| 6:163750378:C_CG    | 6  | 163750378 | CG    | 0.4138 | 0.0403  | 0.0032 | 5.78E-36  |
| 6:169889938:C_T     | 6  | 169889938 | T     | 0.0108 | -0.1872 | 0.0150 | 7.44E-36  |
| 6:159942186:C_T     | 6  | 159942186 | T     | 0.0065 | -0.2378 | 0.0190 | 7.47E-36  |
| 6:161475423:A_G     | 6  | 161475423 | A     | 0.9942 | 0.2980  | 0.0239 | 1.08E-35  |
| 6:164397666:A_C     | 6  | 164397666 | A     | 0.0148 | 0.1600  | 0.0129 | 1.51E-35  |
| 6:152508715:A_T     | 6  | 152508715 | A     | 0.005  | 0.2717  | 0.0219 | 1.76E-35  |
| 6:164441428:C_G     | 6  | 164441428 | C     | 0.9213 | 0.0677  | 0.0055 | 3.57E-35  |
| 6:156446478:G_T     | 6  | 156446478 | T     | 0.0096 | 0.1969  | 0.0159 | 3.66E-35  |
| 6:156517922:A_G     | 6  | 156517922 | A     | 0.0069 | 0.2263  | 0.0183 | 5.98E-35  |
| 6:158887057:A_G     | 6  | 158887057 | A     | 0.9883 | -0.1772 | 0.0144 | 8.37E-35  |
| 6:152428704:C_G     | 6  | 152428704 | C     | 0.5463 | -0.0372 | 0.0030 | 1.55E-34  |
| 6:160747986:A_C     | 6  | 160747986 | A     | 0.9896 | 0.2154  | 0.0176 | 2.68E-34  |
| 6:163789882:A_AT    | 6  | 163789882 | A     | 0.6999 | 0.0418  | 0.0034 | 2.74E-34  |
| 6:151602279:C_T     | 6  | 151602279 | T     | 0.0065 | 0.2451  | 0.0202 | 6.88E-34  |
| 6:160503002:C_G     | 6  | 160503002 | C     | 0.9675 | -0.1123 | 0.0093 | 7.35E-34  |
| 6:159164512:G_GTT   | 6  | 159164512 | G     | 0.7622 | -0.0436 | 0.0036 | 2.00E-33  |
| 6:157809830:A_G     | 6  | 157809830 | A     | 0.9943 | 0.2359  | 0.0202 | 1.61E-31  |
| 6:154186805:G_T     | 6  | 154186805 | T     | 0.041  | 0.0876  | 0.0075 | 1.83E-31  |
| 6:169498637:C_T     | 6  | 169498637 | T     | 0.9782 | -0.1203 | 0.0104 | 6.94E-31  |
| 6:166970144:A_T     | 6  | 166970144 | A     | 0.0082 | -0.2014 | 0.0176 | 2.83E-30  |
| 6:157411848:C_G     | 6  | 157411848 | C     | 0.0133 | -0.1589 | 0.0139 | 2.89E-30  |
| 6:154565935:C_G     | 6  | 154565935 | C     | 0.9813 | 0.1301  | 0.0114 | 4.20E-30  |
| 6:166554017:C_T     | 6  | 166554017 | T     | 0.0847 | 0.0629  | 0.0055 | 7.50E-30  |
| 6:160535532:A_G     | 6  | 160535532 | A     | 0.0199 | -0.1348 | 0.0120 | 2.50E-29  |
| 6:168591107:A_G     | 6  | 168591107 | A     | 0.8119 | 0.0444  | 0.0040 | 2.63E-29  |
| 6:155767053:A_G     | 6  | 155767053 | A     | 0.9833 | 0.1399  | 0.0125 | 3.19E-29  |
| 6:154126632:C_CA    | 6  | 154126632 | CA    | 0.9041 | 0.0561  | 0.0051 | 2.11E-28  |
| 6:164531965:C_T     | 6  | 164531965 | T     | 0.0401 | -0.0846 | 0.0077 | 4.79E-28  |
| 6:155134201:A_G     | 6  | 155134201 | A     | 0.9899 | -0.1697 | 0.0155 | 5.84E-28  |
| 6:160472415:A_G     | 6  | 160472415 | A     | 0.0058 | 0.2797  | 0.0260 | 5.48E-27  |
| 6:165970588:C_T     | 6  | 165970588 | T     | 0.0897 | -0.0563 | 0.0053 | 1.33E-26  |
| 6:157177304:A_T     | 6  | 157177304 | A     | 0.0196 | 0.1167  | 0.0109 | 1.65E-26  |
| 6:161704533:C_T     | 6  | 161704533 | T     | 0.5459 | 0.0333  | 0.0032 | 1.11E-25  |
| 6:167871963:G_T     | 6  | 167871963 | T     | 0.9408 | 0.0732  | 0.0072 | 1.62E-24  |
| 6:166680929:A_T     | 6  | 166680929 | A     | 0.0941 | -0.0513 | 0.0053 | 2.20E-22  |
| 6:169039497:C_T     | 6  | 169039497 | T     | 0.7722 | -0.0344 | 0.0036 | 6.87E-22  |
| 6:152063998:A_G     | 6  | 152063998 | A     | 0.4426 | 0.0282  | 0.0029 | 1.07E-21  |
| 6:162567622:C_T     | 6  | 162567622 | T     | 0.0073 | -0.1809 | 0.0190 | 1.39E-21  |
| 6:158891086:C_T     | 6  | 158891086 | T     | 0.0347 | -0.0778 | 0.0083 | 4.08E-21  |
| 6:169435687:A_G     | 6  | 169435687 | A     | 0.0107 | -0.1356 | 0.0147 | 2.66E-20  |
| 6:166638596:C_G     | 6  | 166638596 | C     | 0.9752 | -0.0944 | 0.0103 | 4.07E-20  |
| 6:163483731:A_G     | 6  | 163483731 | A     | 0.5505 | 0.0312  | 0.0035 | 7.86E-19  |
| 6:163612103:C_T     | 6  | 163612103 | T     | 0.0092 | -0.1370 | 0.0159 | 7.56E-18  |
| 6:163539289:G_T     | 6  | 163539289 | T     | 0.3629 | 0.0313  | 0.0037 | 1.36E-17  |
| 6:161665020:A_G     | 6  | 161665020 | A     | 0.928  | -0.0531 | 0.0063 | 2.28E-17  |
| 6:162251557:A_T     | 6  | 162251557 | A     | 0.9148 | 0.0443  | 0.0058 | 2.49E-14  |
| 6:151467182:C_T     | 6  | 151467182 | T     | 0.4779 | 0.0211  | 0.0029 | 5.68E-13  |
| 6:162047938:C_T     | 6  | 162047938 | T     | 0.294  | -0.0232 | 0.0033 | 1.78E-12  |
| 6:160698937:G_GTTTT | 6  | 160698937 | G     | 0.0245 | -0.0985 | 0.0145 | 1.05E-11  |
| TTC                 |    |           |       |        |         |        |           |
| 6:167501529:C_G     | 6  | 167501529 | C     | 0.9708 | -0.0597 | 0.0088 | 1.33E-11  |
| 6:166650293:A_G     | 6  | 166650293 | A     | 0.8392 | -0.0267 | 0.0041 | 6.34E-11  |
| 6:159005685:A_G     | 6  | 159005685 | A     | 0.2725 | 0.0208  | 0.0034 | 1.23E-09  |
| 9:10599267:A_G      | 9  | 10599267  | A     | 0.0052 | 0.1434  | 0.0226 | 2.23E-10  |
| 10:31009857:A_G     | 10 | 31009857  | A     | 0.9525 | 0.0460  | 0.0074 | 5.11E-10  |
| 12:125539193:C_T    | 12 | 125539193 | T     | 0.0088 | -0.1004 | 0.0171 | 4.33E-09  |
| 13:110797505:C_T    | 13 | 110797505 | T     | 0.0058 | 0.1312  | 0.0210 | 4.18E-10  |
| 16:56987369:C_T     | 16 | 56987369  | T     | 0.6768 | 0.0301  | 0.0031 | 2.78E-22  |
| 17:64224775:C_T     | 17 | 64224775  | T     | 0.0304 | 0.1238  | 0.0087 | 6.35E-46  |
| 17:17432744:A_G     | 17 | 17432744  | A     | 0.5481 | -0.0207 | 0.0029 | 9.51E-13  |
| 19:45413233:G_T     | 19 | 45413233  | T     | 0.0777 | -0.1480 | 0.0057 | 2.40E-150 |
| 19:45441283:G_T     | 19 | 45441283  | T     | 0.1442 | 0.0291  | 0.0044 | 5.58E-11  |
| 19:49189315:A_AG    | 19 | 49189315  | A     | 0.3146 | -0.0222 | 0.0034 | 7.23E-11  |
| 19:45421650:A_G     | 19 | 45421650  | A     | 0.0284 | 0.0591  | 0.0091 | 8.56E-11  |
| 19:11196651:A_AT    | 19 | 11196651  | A     | 0.143  | -0.0292 | 0.0045 | 8.67E-11  |

|             |                  |    |           |   |        |         |        |           |
|-------------|------------------|----|-----------|---|--------|---------|--------|-----------|
| South Asian | 6:161017363:A_G  | 6  | 161017363 | A | 0.0927 | 0.7442  | 0.0343 | 3.02E-104 |
|             | 6:161010118:A_G  | 6  | 161010118 | A | 0.9891 | -1.0834 | 0.0773 | 1.29E-44  |
|             | 6:161079176:C_G  | 6  | 161079176 | C | 0.979  | -0.7733 | 0.0606 | 2.70E-37  |
|             | 6:161162495:C_T  | 6  | 161162495 | T | 0.0063 | 1.2125  | 0.1011 | 3.69E-33  |
|             | 6:161006077:C_T  | 6  | 161006077 | T | 0.025  | -0.4819 | 0.0522 | 2.78E-20  |
|             | 6:161024026:G_GT | 6  | 161024026 | G | 0.5315 | -0.1775 | 0.0198 | 3.41E-19  |
|             | 6:160953642:A_G  | 6  | 160953642 | A | 0.9671 | 0.3693  | 0.0447 | 1.49E-16  |
|             | 6:161033124:A_G  | 6  | 161033124 | A | 0.7422 | 0.1611  | 0.0201 | 1.17E-15  |
|             | 6:160720804:C_G  | 6  | 160720804 | C | 0.0069 | 0.8667  | 0.1085 | 1.36E-15  |
|             | 6:160911596:A_G  | 6  | 160911596 | A | 0.0097 | 0.6926  | 0.0894 | 9.24E-15  |
|             | 6:161030686:C_T  | 6  | 161030686 | T | 0.005  | 1.1238  | 0.1454 | 1.07E-14  |
|             | 6:160971286:C_G  | 6  | 160971286 | C | 0.8687 | 0.2067  | 0.0273 | 3.81E-14  |
|             | 6:160960359:C_T  | 6  | 160960359 | T | 0.0441 | -0.2991 | 0.0398 | 5.48E-14  |
|             | 6:161126741:C_T  | 6  | 161126741 | T | 0.9602 | -0.3048 | 0.0422 | 5.00E-13  |
|             | 6:161212477:A_G  | 6  | 161212477 | A | 0.0056 | 0.8013  | 0.1244 | 1.17E-10  |
|             | 6:161124143:G_T  | 6  | 161124143 | T | 0.0075 | -0.6503 | 0.1044 | 4.65E-10  |
|             | 19:45412079:C_T  | 19 | 45412079  | T | 0.0428 | -0.2286 | 0.0391 | 4.92E-09  |

\*Conditioned value. BP, base pair (build 37). Chr, chromosome

**Supplemental Table 8.** Estimated % variance explained in a Lp(a) genome-wide association studies in populations of African, East Asian, European, and South Asian ancestry. Estimates are presented overall and after restriction to the *LPA* locus.

| Ancestry    | Estimated heritability (variance %, SE)* |       |                  |      |
|-------------|------------------------------------------|-------|------------------|------|
|             | Genome-wide                              |       | <i>LPA</i> locus |      |
| African     | 38.4%                                    | 5.7%  | 45.7%            | 1.7% |
| East Asian  | 13.1%                                    | 10.0% | 22.5%            | 3.3% |
| European    | 28.3%                                    | 1.0%  | 76.1%            | 0.5% |
| South Asian | 19.6%                                    | 4.2%  | 56.3%            | 1.7% |

\*Ratio of additive genetic variance to phenotypic variance, estimate and SE;

**Supplemental Table 9.** Prediction performance of the genetic scores across four ancestral populations in UK Biobank. Score performance was assessed by estimating the incremental R<sup>2</sup> while accounting for age, sex, population structure and study centers and AUC for dichotomized Lp(a) at 125nmol/L.

| PRS methods                                       | Genetic regions              | No. of SNPs |           |          |           | R <sup>2</sup> |     |     |     | AUC* |      |      |      |
|---------------------------------------------------|------------------------------|-------------|-----------|----------|-----------|----------------|-----|-----|-----|------|------|------|------|
|                                                   |                              | EUR         | AFR       | SAS      | EAS       | EUR            | AFR | SAS | EAS | EUR  | AFR  | SAS  | EAS  |
| External PRS                                      | <i>LPA</i> gene <sup>≡</sup> | 43          | 43        | 43       | 43        | 50%            | 2%  | 11% | 2%  | 0.90 | 0.55 | 0.70 | 0.54 |
| P+T                                               | <i>LPA</i> gene              | 196         | 9         | 237      | 2         | 30%            | 12% | 5%  | 10% | 0.82 | 0.66 | 0.61 | 0.55 |
| LDpred2                                           | <i>LPA</i> gene              | 14,849      | 23,929    | 13,502   | 8,620     | 31%            | 17% | 4%  | 10% | 0.83 | 0.70 | 0.60 | 0.56 |
| GWAS significant independent signals <sup>‡</sup> | <i>LPA</i> gene              | 200         | 39        | 16       | 3         | 37%            | 25% | 16% | 12% | 0.87 | 0.74 | 0.70 | 0.58 |
| GWAS significant independent signals              | Genome-wide                  | 245         | 40        | 17       | 3         | 37%            | 27% | 17% | 12% | 0.87 | 0.75 | 0.70 | 0.58 |
| Crosspred                                         | <i>LPA</i> gene              | 18,193      | 28,075    | 17,214   | 13,640    | 42%            | 24% | 20% | 15% | 0.88 | 0.74 | 0.72 | 0.66 |
| Crosspred <sup>†</sup>                            | Genome-wide                  | 1,094,755   | 1,094,755 | 1,094,75 | 1,094,755 | 29%            | 11% | 10% | 9%  | 0.84 | 0.66 | 0.66 | 0.53 |

AUC = area under the receiver operator curve; EUR = European ancestry; AFR = African ancestry; SAS = South Asian ancestry; EAS = East Asian ancestry

<sup>≡</sup>*Lp(a)* levels were dichotomized using a threshold of 150 nmol/L.

<sup>†</sup>hapmap3 SNPs across all chromosomes were included.

<sup>‡</sup>Genome-wide significant secondary signals were identified in trans-ethnic populations.

**Supplemental Table 10.** Nominally significant results from a phenome-wide association study of genetically inferred lipoprotein(a) in a maximum of N=8,946 Hispanic/Latino, N=6,215 African American, and N=7,715 Whites restricting to circulatory system phenotypes.

| Phenotype | Description                                         | Group              | N cases | Hispanic/Latino |         | African American |                 | White   |         |                |         |
|-----------|-----------------------------------------------------|--------------------|---------|-----------------|---------|------------------|-----------------|---------|---------|----------------|---------|
|           |                                                     |                    |         | Beta (SE)       | P-value | N cases          | Beta (SE)       | P-value | N cases | Beta (SE)      | P-value |
| 394       | Rheumatic disease of the heart valves               | Circulatory system | 120     | 0.059 (0.096)   | 0.54    | 71               | -0.44 (0.16)    | 0.0054  | 160     | -0.016 (0.084) | 0.85    |
| 394.2     | Mitral valve disease                                | Circulatory system | 76      | 0.069 (0.12)    | 0.55    | 52               | -0.41 (0.18)    | 0.023   | 110     | -0.077 (0.11)  | 0.47    |
| 395       | Heart valve disorders                               | Circulatory system | 370     | 0.11 (0.054)    | 0.034   | 240              | -0.1 (0.071)    | 0.15    | 520     | 0.091 (0.045)  | 0.044   |
| 395.2     | Nonrheumatic aortic valve disorders                 | Circulatory system | 200     | 0.088 (0.074)   | 0.23    | 120              | -0.099 (0.1)    | 0.33    | 290     | 0.19 (0.057)   | 0.0012  |
| 395.6     | Heart valve replaced                                | Circulatory system | 85      | 0.26 (0.1)      | 0.01    | 53               | -0.26 (0.17)    | 0.12    | 130     | 0.2 (0.084)    | 0.016   |
| 411       | Ischemic Heart Disease                              | Circulatory system | 1400    | 0.11 (0.034)    | 0.00083 | 680              | 0.017 (0.043)   | 0.69    | 740     | 0.025 (0.043)  | 0.57    |
| 411.2     | Myocardial infarction                               | Circulatory system | 150     | 0.21 (0.079)    | 0.0078  | 92               | -0.014 (0.11)   | 0.9     | 72      | -0.11 (0.14)   | 0.42    |
| 411.3     | Angina pectoris                                     | Circulatory system | 360     | 0.15 (0.057)    | 0.009   | 170              | -0.0067 (0.08)  | 0.93    | 100     | -0.025 (0.11)  | 0.82    |
| 411.4     | Coronary atherosclerosis                            | Circulatory system | 1200    | 0.12 (0.036)    | 0.001   | 620              | 0.012 (0.045)   | 0.79    | 710     | 0.036 (0.044)  | 0.42    |
| 426.32    | Left bundle branch block                            | Circulatory system | 34      | 0.48 (0.16)     | 0.0033  |                  |                 |         | 23      | 0.26 (0.17)    | 0.12    |
| 426.92    | Cardiac defibrillator in situ                       | Circulatory system | 130     | 0.22 (0.09)     | 0.016   | 85               | 0.044 (0.11)    | 0.69    | 62      | -0.08 (0.14)   | 0.57    |
| 427       | Cardiac dysrhythmias                                | Circulatory system | 1300    | 0.082 (0.033)   | 0.013   | 790              | -0.0063 (0.039) | 0.87    | 930     | -0.061 (0.039) | 0.11    |
| 427.7     | Tachycardia NOS                                     | Circulatory system | 170     | 0.23 (0.076)    | 0.0023  | 130              | -0.026 (0.092)  | 0.78    | 77      | -0.22 (0.14)   | 0.11    |
| 429.1     | Heart transplant/surgery                            | Circulatory system | 32      | -0.067 (0.2)    | 0.74    | 27               | 0.006 (0.2)     | 0.98    | 24      | 0.33 (0.16)    | 0.031   |
| 430       | Intracranial hemorrhage                             | Circulatory system | 73      | -0.0041 (0.11)  | 0.97    | 29               | 0.42 (0.13)     | 0.0015  | 28      | 0.096 (0.18)   | 0.59    |
| 433.2     | Occlusion of cerebral arteries                      | Circulatory system | 380     | 0.022 (0.058)   | 0.7     | 320              | -0.026 (0.06)   | 0.67    | 99      | -0.29 (0.13)   | 0.033   |
| 433.21    | Cerebral artery occlusion, with cerebral infarction | Circulatory system | 370     | 0.028 (0.059)   | 0.63    | 310              | -0.017 (0.06)   | 0.78    | 90      | -0.31 (0.14)   | 0.03    |
| 440       | Atherosclerosis                                     | Circulatory system | 200     | 0.1 (0.077)     | 0.19    | 110              | -0.068 (0.11)   | 0.53    | 67      | 0.21 (0.11)    | 0.047   |
| 443.1     | Raynaud's syndrome                                  | Circulatory system | 34      | -0.044 (0.18)   | 0.81    | 21               | -0.77 (0.32)    | 0.016   | 52      | -0.21 (0.17)   | 0.23    |
| 446.9     | Arteritis NOS                                       | Circulatory system | 23      | -0.77 (0.39)    | 0.045   |                  |                 |         |         |                |         |
| 447.7     | Aortic ectasia                                      | Circulatory system | 22      | -1 (0.47)       | 0.029   | 20               | -0.61 (0.32)    | 0.053   | 37      | -0.084 (0.19)  | 0.65    |
| 456       | Chronic venous insufficiency [CVI]                  | Circulatory system | 360     | -0.16 (0.065)   | 0.014   | 200              | -0.062 (0.075)  | 0.41    | 130     | -0.24 (0.11)   | 0.032   |
| 459.7     | Blood vessel replaced                               | Circulatory system | 48      | 0.43 (0.13)     | 0.00075 | 24               | 0.12 (0.19)     | 0.53    | 22      | -0.67 (0.4)    | 0.094   |

**REFERENCES**

1. Sudlow C, Gallacher J, Allen N, Beral V, Burton P, Danesh J, Downey P, Elliott P, Green J, Landray M, et al. UK biobank: an open access resource for identifying the causes of a wide range of complex diseases of middle and old age. *PLoS Med.* 2015;12:e1001779. doi: 10.1371/journal.pmed.1001779
2. Bycroft C, Freeman C, Petkova D, Band G, Elliott LT, Sharp K, Motyer A, Vukcevic D, Delaneau O, O'Connell J, et al. The UK Biobank resource with deep phenotyping and genomic data. *Nature.* 2018;562:203-209. doi: 10.1038/s41586-018-0579-z
3. Matisse TC, Ambite JL, Buyske S, Carlson CS, Cole SA, Crawford DC, Haiman CA, Heiss G, Kooperberg C, Marchand LL, et al. The Next PAGE in understanding complex traits: design for the analysis of Population Architecture Using Genetics and Epidemiology (PAGE) Study. *Am J Epidemiol.* 2011;174:849-859. doi: 10.1093/aje/kwr160
4. The Atherosclerosis Risk in Communities (ARIC) Study: design and objectives. The ARIC investigators. *Am J Epidemiol.* 1989;129:687-702.
5. Friedman GD, Cutter GR, Donahue RP, Hughes GH, Hulley SB, Jacobs DR, Jr., Liu K, Savage PJ. CARDIA: study design, recruitment, and some characteristics of the examined subjects. *J Clin Epidemiol.* 1988;41:1105-1116. doi: 10.1016/0895-4356(88)90080-7
6. Taylor HA, Jr., Wilson JG, Jones DW, Sarpong DF, Srinivasan A, Garrison RJ, Nelson C, Wyatt SB. Toward resolution of cardiovascular health disparities in African Americans: design and methods of the Jackson Heart Study. *Ethn Dis.* 2005;15:S6-4-17.



7. Fuqua SR, Wyatt SB, Andrew ME, Sarpong DF, Henderson FR, Cunningham MF, Taylor HA, Jr. Recruiting African-American research participation in the Jackson Heart Study: methods, response rates, and sample description. *Ethn Dis*. 2005;15:S6-18-29.
8. Bild DE, Bluemke DA, Burke GL, Detrano R, Diez Roux AV, Folsom AR, Greenland P, Jacob DR, Jr., Kronmal R, Liu K, et al. Multi-Ethnic Study of Atherosclerosis: objectives and design. *Am J Epidemiol*. 2002;156:871-881. doi: 10.1093/aje/kwf113
9. Design of the Women's Health Initiative clinical trial and observational study. The Women's Health Initiative Study Group. *Control Clin Trials*. 1998;19:61-109. doi: 10.1016/s0197-2456(97)00078-0
10. Trinder M, Uddin MM, Finneran P, Aragam KG, Natarajan P. Clinical Utility of Lipoprotein(a) and LPA Genetic Risk Score in Risk Prediction of Incident Atherosclerotic Cardiovascular Disease. *JAMA cardiology*. 2020. doi: 10.1001/jamacardio.2020.5398
11. Euesden J, Lewis CM, O'Reilly PF. PRSice: Polygenic Risk Score software. *Bioinformatics*. 2015;31:1466-1468. doi: 10.1093/bioinformatics/btu848
12. Prive F, Arbel J, Vilhjalmsjon BJ. LDpred2: better, faster, stronger. *Bioinformatics*. 2020. doi: 10.1093/bioinformatics/btaa1029
13. Mak TSH, Porsch RM, Choi SW, Sham PC. Polygenic scores for UK Biobank scale data. *BioRxiv*. 2018:252270.
14. Burgess S, Ference BA, Staley JR, Freitag DF, Mason AM, Nielsen SF, Willeit P, Young R, Surendran P, Karthikeyan S, et al. Association of LPA Variants With Risk of Coronary Disease and the Implications for Lipoprotein(a)-Lowering Therapies: A

- Mendelian Randomization Analysis. *JAMA cardiology*. 2018;3:619-627. doi: 10.1001/jamacardio.2018.1470
15. Berisa T, Pickrell JK. Approximately independent linkage disequilibrium blocks in human populations. *Bioinformatics*. 2016;32:283-285. doi: 10.1093/bioinformatics/btv546
16. Madsen CM, Kamstrup PR, Langsted A, Varbo A, Nordestgaard BG. Lipoprotein(a)-Lowering by 50 mg/dL (105 nmol/L) May Be Needed to Reduce Cardiovascular Disease 20% in Secondary Prevention: A Population-Based Study. *Arterioscler Thromb Vasc Biol*. 2020;40:255-266. doi: 10.1161/ATVBAHA.119.312951
